# Supplementary material for: Lipid profile of Mexican children with Down syndrome
Source: Springer Nature journal article supplement (doi:10.1186/s12887-021-02542-1), 2021-02-13
Supplement: MOESM1 [file 18859904]

Lipid profile of Mexican children with Down syndrome

Authors: Silvestre García de la Puente, Karla A. Flores Arizmendi, María J. Delgado Montemayor, Tania T. Vargas Robledo

|                             |                                                                                                             |
|-----------------------------|-------------------------------------------------------------------------------------------------------------|
| sex                         | 0 = female, 1 = male                                                                                        |
| age 2 a 9 años              | 0 = 2 a 9 years, 1 = 10 a 18 years                                                                          |
| age 4 groups                | 0 = 2 a 4, 1 = 5 a 7, 2 = 8 a 10, 3 = 11 a 18 years                                                         |
| age 3 groups                | 0 = 2 a 7, 1 = 8 a 10, 2 = 11 a 18 years                                                                    |
| age 11 a 18                 | 0 = 2 a 10, 1 = 11 a 18 years                                                                               |
| overweight_obesity          | 0 = no, 1 = yes                                                                                             |
| nutrition                   | 0 = low weight, 1 = normal, 2 = overweight, 3 = obesity                                                     |
| chol classific              | 0 = acceptable, 1 = borderline, 2 = high                                                                    |
| LDL classific               | 0 = acceptable, 1 = borderline, 2 = high                                                                    |
| TG classific                | 0 = acceptable, 1 = borderline, 2 = high                                                                    |
| HDL classific               | 0 = acceptable, 1 = borderline, 2 = low                                                                     |
| noHDL clasific              | 0 = acceptable, 1 = borderline, 2 = high                                                                    |
| dyslipidemia classification | 0 = normal, 1 = high cholesterol and/or LDL, 2 = high triglycerid, 3 = HDL low<br>4 = combined dyslipidemia |
| high chol and low HDL       | 1 = high cholesterol and low hdl                                                                            |
| simple classific            | 0 = without dyslipidemia, 1 = isolated dyslipidemia, 2 = combined dyslipidemia                              |
| nutrition 2                 | 0 = low weight or normal, 1 = overweight, 2 = obesity                                                       |
| all dichotomous variables   | 0 = no, 1 = yes                                                                                             |
