# Supplementary material for: Lipid profile of Mexican children with Down syndrome
Source: Springer Nature journal article supplement (doi:10.1186/s12887-021-02542-1), 2021-02-13
Supplement: MOESM2 [file 18859904]

Lipid profile of Mexican children with Down syndrome

Authors: Silvestre García de la Puente, Karla A. Flores Arizmendi, María J. Delgado Montemayor, Tania T. Vargas Robles

| ID  | cytogenetics  | weight Kg | percentile weight | height cm | percentile height | sex | age year |
|-----|---------------|-----------|-------------------|-----------|-------------------|-----|----------|
| 363 | REGULAR       | 10.6      | 50                | 80        | 50                | 50  | 0        |
| 310 | REGULAR       | 10.18     | 25                | 79        | 25                | 25  | 0        |
| 300 | REGULAR       | 9.535     | 10                | 76.8      | 10                | 10  | 1        |
| 266 | REGULAR       | 9.46      | 10                | 79        | 25                | 25  | 1        |
| 330 | REGULAR       | 10.4      | 25                | 79        | 25                | 25  | 1        |
| 133 | NOT SPECIFIED | 7.4       | 2                 | 72        |                   |     | 0        |
| 379 | REGULAR       | 10.3      | 25                | 82        | 75                | 75  | 0        |
| 61  | REGULAR       | 10.3      | 25                | 79.7      | 25                | 25  | 1        |
| 69  | REGULAR       | 9.885     | 2                 | 76        | 5                 | 5   | 1        |
| 308 | REGULAR       | 11.4      | 50                | 86.5      | 98                | 98  | 0        |
| 273 | REGULAR       | 10.6      | 50                | 81        | 50                | 50  | 0        |
| 121 | REGULAR       | 12.7      | 75                | 84.5      | 75                | 75  | 1        |
| 323 | NOT SPECIFIED | 11.5      | 50                | 85.5      | 75                | 75  | 1        |
| 48  | REGULAR       | 12.7      | 75                | 86        | 75                | 75  | 1        |
| 355 | REGULAR       | 7.68      | 2                 | 76.6      | 5                 | 5   | 1        |
| 9   | REGULAR       | 12.78     | 75                | 84        | 75                | 75  | 1        |
| 65  | REGULAR       | 8.3       | 2                 | 75        | 10                | 10  | 0        |
| 317 | MOSAICISM     | 9.2       | 10                | 79        | 25                | 25  | 0        |
| 114 | REGULAR       | 8.3       | 2                 | 73.9      | 5                 | 5   | 0        |
| 125 | REGULAR       | 8.43      | 2                 | 76.4      | 5                 | 5   | 1        |
| 230 | REGULAR       | 8.55      | 2                 | 82.7      | 50                | 50  | 1        |
| 98  | MOSAICISM     | 10.48     | 25                | 84.6      | 50                | 50  | 0        |
| 286 | REGULAR       | 10.4      | 25                | 82        | 25                | 25  | 0        |
| 328 | REGULAR       | 11.98     | 50                | 87        | 75                | 75  | 0        |
| 45  | REGULAR       | 11.7      | 25                | 86        | 50                | 50  | 1        |
| 165 | REGULAR       | 9.735     | 5                 | 69        | 2                 | 2   | 1        |
| 374 | REGULAR       | 10        | 10                | 78.7      | 5                 | 5   | 1        |
| 126 | NOT SPECIFIED | 9.7       | 5                 | 79        | 5                 | 5   | 1        |
| 74  | REGULAR       | 14        | 75                | 97        | 98                | 98  | 1        |
| 333 | REGULAR       | 10.88     | 10                | 82        | 25                | 25  | 1        |
| 380 | REGULAR       | 9.8       | 5                 | 80        | 10                | 10  | 1        |
| 356 | REGULAR       | 10.6      | 10                | 78.5      | 5                 | 5   | 1        |
| 221 | REGULAR       | 12.82     | 75                | 80        | 25                | 25  | 0        |
| 12  | REGULAR       | 9         | 2                 | 85        | 75                | 75  | 0        |
| 321 | REGULAR       | 10.92     | 25                | 84        | 50                | 50  | 0        |
| 73  | REGULAR       | 11        | 25                | 84.7      | 50                | 50  | 0        |
| 176 | REGULAR       | 10.29     | 10                | 83.1      | 25                | 25  | 1        |
| 18  | NOT SPECIFIED | 13.3      | 75                | 95        | 98                | 98  | 1        |
| 316 | MOSAICISM     | 10.5      | 25                | 82        | 25                | 25  | 0        |
| 331 | REGULAR       | 8.835     | 2                 | 76.4      | 5                 | 5   | 0        |
| 283 | REGULAR       | 10.3      | 25                | 80.7      | 25                | 25  | 0        |

|     |               |        |    |      |    |   |
|-----|---------------|--------|----|------|----|---|
| 255 | REGULAR       | 10.06  | 25 | 83   | 50 | 0 |
| 319 | REGULAR       | 9.52   | 2  | 79   | 5  | 1 |
| 123 | REGULAR       | 10.82  | 10 | 84   | 25 | 1 |
| 1   | REGULAR       | 13.6   | 75 | 88   | 75 | 1 |
| 291 | REGULAR       | 12.55  | 50 | 90   | 90 | 1 |
| 154 | REGULAR       | 9.6    | 5  | 76   | 2  | 1 |
| 318 | REGULAR       | 13.01  | 75 | 88   | 75 | 1 |
| 152 | REGULAR       | 14.25  | 90 | 90   | 98 | 0 |
| 91  | REGULAR       | 12.53  | 50 | 90.5 | 90 | 1 |
| 274 | REGULAR       | 11.8   | 25 | 80.3 | 10 | 1 |
| 26  | REGULAR       | 10.8   | 10 | 89   | 75 | 1 |
| 220 | REGULAR       | 11.1   | 10 | 86.3 | 50 | 1 |
| 85  | REGULAR       | 10.3   | 10 | 83   | 25 | 0 |
| 371 | REGULAR       | 9.6    | 2  | 80   | 2  | 1 |
| 287 | REGULAR       | 10.7   | 10 | 87   | 50 | 0 |
| 295 | REGULAR       | 10.7   | 10 | 87   | 50 | 0 |
| 171 | NOT SPECIFIED | 13.25  | 50 | 88.5 | 50 | 1 |
| 322 | REGULAR       | 13.25  | 50 | 89   | 50 | 1 |
| 352 | REGULAR       | 13     | 50 | 88   | 50 | 1 |
| 189 | TRANSLOCATION | 10.85  | 10 | 80   | 10 | 0 |
| 243 | REGULAR       | 11.96  | 25 | 85   | 25 | 0 |
| 14  | REGULAR       | 14.2   | 75 | 93.3 | 98 | 0 |
| 87  | REGULAR       | 10     | 5  | 86.1 | 50 | 0 |
| 36  | REGULAR       | 11.44  | 10 | 85   | 25 | 1 |
| 151 | REGULAR       | 13.3   | 50 | 92   | 75 | 1 |
| 233 | REGULAR       | 11.23  | 10 | 88.7 | 50 | 1 |
| 138 | NOT SPECIFIED | 14.1   | 75 | 98   | 98 | 1 |
| 153 | TRANSLOCATION | 10.5   | 5  | 85   | 10 | 0 |
| 166 | REGULAR       | 11.93  | 10 | 87.9 | 25 | 1 |
| 343 | TRANSLOCATION | 12.8   | 25 | 87   | 25 | 0 |
| 149 | REGULAR       | 14.2   | 50 | 93   | 75 | 0 |
| 200 | REGULAR       | 10.6   | 5  | 81.2 | 2  | 1 |
| 278 | REGULAR       | 10.5   | 5  | 87.5 | 25 | 0 |
| 271 | REGULAR       | 12.34  | 10 | 88   | 25 | 1 |
| 17  | REGULAR       | 11.31  | 10 | 83   | 2  | 1 |
| 64  | REGULAR       | 11.262 | 10 | 95   | 75 | 1 |
| 49  | REGULAR       | 13     | 25 | 88   | 25 | 1 |
| 110 | REGULAR       | 21.5   | 98 | 103  | 98 | 1 |
| 213 | NOT SPECIFIED | 16.1   | 75 | 92   | 75 | 0 |
| 307 | MOSAICISM     | 14.3   | 50 | 89.5 | 50 | 0 |
| 127 | REGULAR       | 14     | 50 | 93   | 75 | 0 |
| 216 | NOT SPECIFIED | 12.5   | 10 | 86.4 | 10 | 1 |
| 72  | TRANSLOCATION | 12.01  | 10 | 89.1 | 25 | 1 |
| 272 | REGULAR       | 13.3   | 25 | 90.5 | 25 | 0 |
| 6   | REGULAR       | 10.69  | 2  | 85.5 | 5  | 0 |

|     |               |       |    |       |    |   |
|-----|---------------|-------|----|-------|----|---|
| 40  | REGULAR       | 11.85 | 5  | 97    | 75 | 1 |
| 368 | REGULAR       | 16.2  | 75 | 96.5  | 75 | 1 |
| 222 | REGULAR       | 15.6  | 50 | 92.6  | 25 | 1 |
| 325 | REGULAR       | 12.4  | 10 | 88    | 10 | 0 |
| 115 | REGULAR       | 13.9  | 50 | 93.5  | 50 | 0 |
| 288 | REGULAR       | 14.1  | 25 | 92    | 25 | 1 |
| 338 | REGULAR       | 21.15 | 98 | 107   | 98 | 1 |
| 251 | NOT SPECIFIED | 15.6  | 50 | 90.5  | 25 | 1 |
| 70  | REGULAR       | 12.45 | 10 | 88    | 10 | 1 |
| 109 | REGULAR       | 10.6  | 2  | 88    | 10 | 0 |
| 146 | REGULAR       | 11.58 | 5  | 93    | 50 | 1 |
| 181 | REGULAR       | 12.8  | 25 | 89    | 25 | 0 |
| 53  | REGULAR       | 12.9  | 10 | 93    | 25 | 0 |
| 265 | REGULAR       | 13.79 | 10 | 98    | 50 | 1 |
| 314 | NOT SPECIFIED | 15.2  | 25 | 98    | 50 | 1 |
| 339 | TRANSLOCATION | 19.7  | 90 | 102   | 90 | 0 |
| 186 | REGULAR       | 17.5  | 75 | 100   | 75 | 0 |
| 33  | REGULAR       | 13.15 | 10 | 94    | 25 | 1 |
| 38  | REGULAR       | 14.5  | 25 | 102   | 90 | 0 |
| 170 | REGULAR       | 13.7  | 25 | 99    | 75 | 0 |
| 185 | REGULAR       | 18.5  | 75 | 100.5 | 75 | 0 |
| 305 | REGULAR       | 14.4  | 25 | 94    | 25 | 0 |
| 128 | REGULAR       | 12.95 | 10 | 90    | 10 | 0 |
| 239 | MOSAICISM     | 20    | 90 | 101   | 75 | 0 |
| 7   | REGULAR       | 16    | 50 | 101.5 | 90 | 0 |
| 108 | NOT SPECIFIED | 17.4  | 75 | 94    | 25 | 0 |
| 320 | MOSAICISM     | 13.2  | 10 | 95    | 25 | 0 |
| 377 | NOT SPECIFIED | 16.1  | 50 | 96.6  | 50 | 0 |
| 82  | REGULAR       | 14.5  | 25 | 101   | 75 | 1 |
| 347 | REGULAR       | 14.7  | 25 | 95.5  | 25 | 1 |
| 5   | REGULAR       | 15.75 | 50 | 96    | 50 | 1 |
| 182 | REGULAR       | 14    | 25 | 97.5  | 50 | 1 |
| 284 | REGULAR       | 10.49 | 2  | 86    | 2  | 1 |
| 129 | REGULAR       | 15.1  | 25 | 95    | 25 | 0 |
| 327 | REGULAR       | 15.6  | 25 | 100   | 50 | 1 |
| 46  | NOT SPECIFIED | 16    | 25 | 105   | 75 | 1 |
| 60  | REGULAR       | 13.45 | 5  | 96    | 10 | 1 |
| 290 | REGULAR       | 14.5  | 10 | 89.5  | 2  | 1 |
| 210 | REGULAR       | 13    | 5  | 97    | 25 | 0 |
| 86  | REGULAR       | 12.8  | 5  | 91    | 5  | 0 |
| 164 | REGULAR       | 11.45 | 2  | 89.4  | 2  | 1 |
| 39  | REGULAR       | 14.3  | 10 | 96.3  | 25 | 0 |
| 209 | REGULAR       | 15.3  | 25 | 97    | 25 | 0 |
| 119 | REGULAR       | 15.2  | 25 | 92    | 5  | 1 |
| 334 | REGULAR       | 18.15 | 50 | 105.5 | 75 | 1 |

|     |               |       |    |       |    |   |
|-----|---------------|-------|----|-------|----|---|
| 285 | NOT SPECIFIED | 16.5  | 25 | 99    | 25 | 1 |
| 4   | REGULAR       | 16.8  | 50 | 106   | 90 | 1 |
| 30  | REGULAR       | 13.2  | 5  | 96    | 25 | 1 |
| 250 | REGULAR       | 18    | 50 | 110   | 95 | 0 |
| 226 | REGULAR       | 14.6  | 25 | 101   | 50 | 0 |
| 158 | REGULAR       | 20    | 75 | 104.5 | 50 | 0 |
| 336 | REGULAR       | 15.7  | 10 | 99    | 5  | 1 |
| 235 | REGULAR       | 15.2  | 10 | 97    | 10 | 1 |
| 113 | REGULAR       | 15.65 | 10 | 102   | 25 | 1 |
| 204 | REGULAR       | 24.5  | 98 | 107   | 75 | 1 |
| 124 | REGULAR       | 12.7  | 2  | 98.2  | 10 | 1 |
| 35  | REGULAR       | 15.5  | 10 | 103   | 50 | 1 |
| 229 | REGULAR       | 13.66 | 2  | 94.2  | 2  | 1 |
| 202 | REGULAR       | 17.25 | 25 | 101   | 25 | 1 |
| 173 | REGULAR       | 18.2  | 50 | 103.5 | 50 | 1 |
| 309 | REGULAR       | 17.6  | 50 | 97    | 10 | 0 |
| 159 | REGULAR       | 13    | 2  | 94    | 2  | 1 |
| 280 | REGULAR       | 18.35 | 50 | 107   | 75 | 1 |
| 191 | TRANSLOCATION | 21.35 | 75 | 113   | 98 | 1 |
| 97  | REGULAR       | 15.9  | 10 | 101.5 | 25 | 1 |
| 134 | REGULAR       | 20.1  | 75 | 112   | 95 | 1 |
| 337 | TRANSLOCATION | 21    | 75 | 114   | 90 | 1 |
| 54  | NOT SPECIFIED | 17.1  | 10 | 106   | 50 | 1 |
| 55  | REGULAR       | 17.1  | 25 | 106   | 50 | 0 |
| 184 | REGULAR       | 14    | 2  | 101   | 25 | 0 |
| 364 | REGULAR       | 18.3  | 50 | 105   | 50 | 0 |
| 262 | REGULAR       | 19.2  | 50 | 103   | 25 | 0 |
| 324 | REGULAR       | 15.8  | 10 | 100   | 10 | 0 |
| 197 | REGULAR       | 18.2  | 50 | 104.5 | 50 | 0 |
| 232 | MOSAICISM     | 21.35 | 50 | 108   | 50 | 1 |
| 349 | NOT SPECIFIED | 26.5  | 95 | 112   | 75 | 1 |
| 130 | REGULAR       | 12.95 | 2  | 90    | 2  | 1 |
| 21  | TRANSLOCATION | 16.5  | 5  | 104.3 | 10 | 1 |
| 41  | REGULAR       | 17.1  | 10 | 104   | 25 | 0 |
| 116 | REGULAR       | 14.9  | 2  | 107   | 50 | 0 |
| 68  | REGULAR       | 17.2  | 10 | 98.2  | 5  | 0 |
| 10  | REGULAR       | 19.5  | 25 | 119   | 95 | 1 |
| 62  | REGULAR       | 20.05 | 50 | 118   | 90 | 1 |
| 88  | REGULAR       | 16    | 5  | 108   | 25 | 1 |
| 42  | REGULAR       | 17.3  | 10 | 103.5 | 10 | 1 |
| 107 | REGULAR       | 15.2  | 5  | 102   | 10 | 0 |
| 297 | REGULAR       | 17.9  | 10 | 102   | 5  | 1 |
| 231 | REGULAR       | 16.5  | 5  | 107.4 | 25 | 1 |
| 228 | REGULAR       | 20.3  | 50 | 114   | 90 | 0 |
| 329 | REGULAR       | 17.3  | 10 | 105.5 | 25 | 0 |

|     |               |        |    |       |    |   |
|-----|---------------|--------|----|-------|----|---|
| 8   | REGULAR       | 19.115 | 10 | 104.9 | 10 | 1 |
| 22  | REGULAR       | 14.3   | 2  | 105.9 | 10 | 0 |
| 245 | REGULAR       | 19.3   | 25 | 105.2 | 10 | 0 |
| 386 | NOT SPECIFIED | 15.35  | 2  | 98    | 2  | 1 |
| 193 | REGULAR       | 24     | 50 | 117.5 | 75 | 1 |
| 76  | REGULAR       | 18.2   | 10 | 99.4  | 2  | 1 |
| 177 | REGULAR       | 17.2   | 5  | 109   | 10 | 1 |
| 112 | REGULAR       | 21.6   | 25 | 106   | 10 | 1 |
| 156 | REGULAR       | 22.7   | 25 | 110   | 10 | 1 |
| 275 | REGULAR       | 23     | 50 | 114   | 50 | 0 |
| 101 | REGULAR       | 20.75  | 25 | 110   | 25 | 0 |
| 258 | REGULAR       | 25.15  | 50 | 117   | 75 | 0 |
| 253 | REGULAR       | 19.85  | 10 | 108   | 5  | 1 |
| 155 | NOT SPECIFIED | 16.8   | 2  | 106   | 2  | 1 |
| 203 | REGULAR       | 21.2   | 25 | 108   | 25 | 0 |
| 59  | REGULAR       | 20.2   | 25 | 111   | 25 | 0 |
| 117 | TRANSLOCATION | 19.8   | 10 | 110   | 10 | 1 |
| 94  | REGULAR       | 17.5   | 5  | 101.5 | 2  | 1 |
| 306 | REGULAR       | 17.8   | 5  | 105   | 10 | 0 |
| 311 | REGULAR       | 20     | 25 | 106   | 10 | 0 |
| 303 | TRANSLOCATION | 18.2   | 5  | 110.5 | 10 | 1 |
| 136 | NOT SPECIFIED | 16     | 2  | 106.5 | 2  | 1 |
| 277 | NOT SPECIFIED | 16     | 2  | 95    | 2  | 1 |
| 225 | REGULAR       | 17     | 2  | 111   | 25 | 0 |
| 56  | REGULAR       | 24     | 50 | 107   | 5  | 1 |
| 206 | REGULAR       | 25     | 50 | 123   | 75 | 1 |
| 132 | REGULAR       | 18     | 5  | 105   | 2  | 1 |
| 282 | REGULAR       | 19.45  | 10 | 110   | 10 | 1 |
| 373 | MOSAICO       | 17.5   | 2  | 110   | 5  | 1 |
| 51  | TRANSLOCATION | 22.2   | 25 | 118   | 25 | 1 |
| 199 | NOT SPECIFIED | 25.5   | 50 | 110.3 | 10 | 0 |
| 144 | REGULAR       | 21.4   | 25 | 116.8 | 50 | 0 |
| 83  | REGULAR       | 27.7   | 75 | 115   | 50 | 0 |
| 111 | REGULAR       | 20     | 10 | 120.7 | 50 | 1 |
| 66  | REGULAR       | 18.1   | 2  | 112.9 | 10 | 1 |
| 89  | REGULAR       | 19     | 5  | 112.5 | 25 | 0 |
| 162 | REGULAR       | 20     | 5  | 109.4 | 10 | 0 |
| 335 | REGULAR       | 16.2   | 2  | 109   | 5  | 0 |
| 289 | REGULAR       | 23     | 10 | 118   | 25 | 1 |
| 299 | REGULAR       | 24.85  | 25 | 116   | 10 | 1 |
| 215 | REGULAR       | 21.2   | 10 | 114   | 25 | 0 |
| 142 | REGULAR       | 21     | 5  | 115   | 10 | 1 |
| 301 | REGULAR       | 26.2   | 25 | 117.5 | 25 | 1 |
| 384 | REGULAR       | 21     | 5  | 115   | 5  | 1 |
| 192 | REGULAR       | 28.2   | 50 | 118   | 10 | 1 |

|     |               |       |    |       |    |   |
|-----|---------------|-------|----|-------|----|---|
| 217 | REGULAR       | 19.3  | 2  | 120   | 25 | 0 |
| 212 | REGULAR       | 15    | 2  | 102   | 2  | 1 |
| 207 | MOSAICISM     | 24.2  | 10 | 119   | 10 | 1 |
| 93  | REGULAR       | 20.6  | 5  | 119   | 25 | 0 |
| 261 | REGULAR       | 27.22 | 25 | 122   | 50 | 0 |
| 163 | REGULAR       | 25.5  | 10 | 126   | 50 | 1 |
| 78  | REGULAR       | 24.6  | 25 | 115   | 10 | 0 |
| 270 | REGULAR       | 19.55 | 2  | 114   | 10 | 0 |
| 292 | NOT SPECIFIED | 22.8  | 10 | 116   | 10 | 1 |
| 67  | REGULAR       | 24.65 | 10 | 111.5 | 2  | 1 |
| 52  | NOT SPECIFIED | 25.4  | 10 | 126   | 75 | 0 |
| 237 | TRANSLOCATION | 30    | 50 | 127   | 75 | 0 |
| 24  | REGULAR       | 25.45 | 10 | 127   | 75 | 0 |
| 175 | REGULAR       | 28.3  | 50 | 120   | 25 | 0 |
| 179 | REGULAR       | 25.2  | 10 | 119   | 10 | 1 |
| 15  | REGULAR       | 35.6  | 75 | 125   | 50 | 1 |
| 90  | REGULAR       | 25    | 10 | 122   | 25 | 1 |
| 256 | MOSAICISM     | 28    | 50 | 126   | 50 | 1 |
| 141 | REGULAR       | 20.6  | 2  | 109.3 | 2  | 0 |
| 99  | REGULAR       | 31    | 50 | 127   | 50 | 0 |
| 120 | REGULAR       | 26.7  | 25 | 121.5 | 25 | 0 |
| 267 | REGULAR       | 22.7  | 10 | 119   | 10 | 0 |
| 367 | REGULAR       | 23    | 10 | 118   | 10 | 1 |
| 80  | REGULAR       | 30.3  | 50 | 125   | 50 | 0 |
| 342 | REGULAR       | 20.3  | 2  | 119.9 | 10 | 0 |
| 71  | NOT SPECIFIED | 30.1  | 50 | 126   | 50 | 1 |
| 241 | REGULAR       | 34    | 50 | 127   | 50 | 1 |
| 201 | REGULAR       | 26.1  | 25 | 122   | 25 | 1 |
| 58  | REGULAR       | 27    | 25 | 114   | 2  | 1 |
| 3   | REGULAR       | 30.8  | 50 | 137   | 95 | 0 |
| 214 | REGULAR       | 22.75 | 10 | 114   | 2  | 1 |
| 254 | REGULAR       | 23.15 | 10 | 125.6 | 25 | 1 |
| 139 | NOT SPECIFIED | 40.4  | 75 | 133   | 75 | 1 |
| 351 | REGULAR       | 43.5  | 75 | 135   | 75 | 0 |
| 104 | REGULAR       | 23.15 | 5  | 111   | 2  | 1 |
| 122 | REGULAR       | 22.05 | 2  | 124   | 25 | 0 |
| 32  | REGULAR       | 24.85 | 10 | 122.5 | 10 | 1 |
| 118 | REGULAR       | 25.35 | 10 | 125   | 25 | 0 |
| 180 | NOT SPECIFIED | 25    | 10 | 116   | 2  | 0 |
| 269 | REGULAR       | 21.7  | 2  | 122   | 5  | 0 |
| 259 | REGULAR       | 39.7  | 75 | 131.4 | 25 | 0 |
| 246 | REGULAR       | 23.4  | 2  | 113.8 | 2  | 0 |
| 16  | REGULAR       | 35.6  | 50 | 136.5 | 75 | 0 |
| 77  | REGULAR       | 37    | 50 | 135   | 75 | 1 |
| 244 | NOT SPECIFIED | 20.9  | 2  | 107.8 | 2  | 1 |

|     |               |        |    |       |    |   |
|-----|---------------|--------|----|-------|----|---|
| 84  | REGULAR       | 33.65  | 50 | 125   | 10 | 0 |
| 315 | REGULAR       | 33.8   | 50 | 128   | 25 | 0 |
| 190 | NOT SPECIFIED | 44.6   | 75 | 132.5 | 50 | 0 |
| 23  | REGULAR       | 26.3   | 5  | 124   | 10 | 0 |
| 178 | REGULAR       | 26.3   | 10 | 124   | 10 | 0 |
| 37  | REGULAR       | 22.3   | 2  | 123.5 | 10 | 1 |
| 247 | REGULAR       | 39.8   | 50 | 132.5 | 25 | 0 |
| 140 | REGULAR       | 32     | 25 | 126.5 | 10 | 1 |
| 234 | REGULAR       | 28.8   | 10 | 124.5 | 10 | 1 |
| 302 | REGULAR       | 27.3   | 10 | 126   | 10 | 0 |
| 205 | REGULAR       | 49     | 75 | 134.5 | 50 | 0 |
| 312 | REGULAR       | 33.6   | 25 | 123.2 | 5  | 0 |
| 219 | REGULAR       | 32.6   | 25 | 129   | 10 | 0 |
| 2   | REGULAR       | 28.65  | 10 | 130   | 25 | 0 |
| 350 | REGULAR       | 28.6   | 10 | 124   | 5  | 0 |
| 240 | NO ESPECIFICA | 23     | 2  | 130   | 25 | 1 |
| 224 | REGULAR       | 37.1   | 50 | 137   | 75 | 1 |
| 187 | REGULAR       | 42.5   | 75 | 136.5 | 50 | 1 |
| 135 | REGULAR       | 37.05  | 50 | 132   | 25 | 0 |
| 27  | REGULAR       | 39.6   | 50 | 130   | 10 | 0 |
| 268 | REGULAR       | 41.5   | 50 | 130   | 10 | 0 |
| 260 | REGULAR       | 41.2   | 50 | 142.9 | 75 | 1 |
| 211 | NOT SPECIFIED | 30     | 10 | 128.5 | 10 | 1 |
| 44  | NOT SPECIFIED | 24.2   | 2  | 129   | 10 | 1 |
| 198 | MOSAICISM     | 40.135 | 50 | 147   | 95 | 1 |
| 276 | NOT SPECIFIED | 28.75  | 10 | 119   | 2  | 0 |
| 103 | REGULAR       | 36     | 25 | 130   | 10 | 1 |
| 194 | REGULAR       | 37.2   | 25 | 137   | 50 | 1 |
| 75  | REGULAR       | 28.2   | 5  | 132   | 10 | 0 |
| 168 | REGULAR       | 31.95  | 10 | 134   | 25 | 1 |
| 172 | NOT SPECIFIED | 33.8   | 25 | 144   | 75 | 1 |
| 188 | NOT SPECIFIED | 35     | 25 | 147   | 90 | 1 |
| 31  | REGULAR       | 34.4   | 25 | 141   | 50 | 0 |
| 227 | NOT SPECIFIED | 29.9   | 10 | 130   | 10 | 0 |
| 19  | NOT SPECIFIED | 41.4   | 50 | 139   | 50 | 0 |
| 238 | REGULAR       | 42.5   | 50 | 145   | 75 | 1 |
| 160 | NOT SPECIFIED | 34.3   | 25 | 147   | 90 | 1 |
| 345 | REGULAR       | 39.5   | 25 | 128   | 2  | 1 |
| 346 | REGULAR       | 31     | 10 | 132   | 10 | 1 |
| 157 | REGULAR       | 37.8   | 25 | 138.5 | 25 | 0 |
| 344 | REGULAR       | 34.75  | 10 | 132   | 10 | 0 |
| 196 | NOT SPECIFIED | 35.5   | 25 | 130   | 2  | 1 |
| 252 | REGULAR       | 30     | 5  | 131   | 10 | 0 |
| 293 | REGULAR       | 33.5   | 10 | 132   | 10 | 0 |
| 92  | REGULAR       | 29.8   | 5  | 129   | 2  | 1 |

|     |               |       |    |       |    |   |
|-----|---------------|-------|----|-------|----|---|
| 11  | REGULAR       | 50    | 50 | 146   | 75 | 0 |
| 279 | REGULAR       | 43.6  | 50 | 141.6 | 50 | 0 |
| 102 | REGULAR       | 52.5  | 75 | 142.5 | 25 | 1 |
| 28  | NOT SPECIFIED | 53.4  | 75 | 138.4 | 25 | 0 |
| 218 | REGULAR       | 35    | 10 | 138   | 10 | 1 |
| 195 | TRANSLOCATION | 48    | 50 | 142   | 10 | 1 |
| 43  | REGULAR       | 37.9  | 10 | 147.5 | 50 | 1 |
| 294 | REGULAR       | 43.3  | 25 | 143.4 | 25 | 1 |
| 50  | REGULAR       | 53.1  | 50 | 153   | 75 | 1 |
| 81  | NOT SPECIFIED | 44.5  | 25 | 140   | 25 | 0 |
| 381 | REGULAR       | 47.5  | 25 | 142   | 10 | 1 |
| 150 | REGULAR       | 48.3  | 50 | 144   | 50 | 0 |
| 313 | REGULAR       | 32.2  | 5  | 125   | 2  | 0 |
| 100 | NOT SPECIFIED | 48.7  | 50 | 142.8 | 50 | 0 |
| 143 | NOT SPECIFIED | 35.65 | 10 | 142.5 | 50 | 0 |
| 63  | MOSAICISM     | 38.5  | 10 | 135   | 10 | 0 |
| 296 | MOSAICISM     | 38.5  | 10 | 135   | 10 | 0 |
| 147 | REGULAR       | 33    | 2  | 130   | 5  | 0 |
| 304 | NOT SPECIFIED | 30.5  | 2  | 134   | 10 | 0 |
| 105 | REGULAR       | 45.3  | 25 | 148   | 75 | 0 |
| 96  | NOT SPECIFIED | 80.2  | 90 | 157   | 75 | 1 |
| 47  | REGULAR       | 48.5  | 25 | 135   | 2  | 1 |
| 263 | REGULAR       | 52    | 25 | 147   | 25 | 1 |
| 332 | REGULAR       | 58.75 | 50 | 156   | 50 | 1 |
| 131 | REGULAR       | 52.6  | 50 | 139   | 25 | 0 |
| 354 | REGULAR       | 47.5  | 10 | 137.5 | 2  | 1 |
| 353 | REGULAR       | 62.3  | 50 | 157   | 50 | 1 |
| 360 | NOT SPECIFIED | 51    | 25 | 144   | 10 | 1 |
| 208 | REGULAR       | 40.5  | 5  | 146   | 10 | 1 |
| 264 | MOSAICISM     | 66.9  | 75 | 159   | 75 | 1 |
| 106 | REGULAR       | 28.1  | 2  | 137.6 | 10 | 0 |
| 183 | NOT SPECIFIED | 47    | 25 | 135   | 10 | 0 |
| 34  | REGULAR       | 45.65 | 25 | 143.5 | 50 | 0 |
| 223 | MOSAICISM     | 42.5  | 10 | 131   | 2  | 0 |
| 25  | TRANSLOCATION | 42.8  | 5  | 148   | 10 | 1 |
| 249 | REGULAR       | 47.8  | 25 | 147.5 | 75 | 0 |
| 161 | REGULAR       | 41    | 10 | 142   | 25 | 0 |
| 95  | REGULAR       | 57.5  | 50 | 143.8 | 50 | 0 |
| 281 | REGULAR       | 44.9  | 10 | 132   | 5  | 0 |
| 236 | REGULAR       | 75    | 75 | 157   | 50 | 1 |
| 348 | REGULAR       | 49    | 10 | 154   | 25 | 1 |
| 79  | MOSAICISM     | 45.7  | 5  | 145   | 5  | 1 |
| 145 | REGULAR       | 51.55 | 10 | 144   | 5  | 1 |
| 248 | NOT SPECIFIED | 69.6  | 75 | 153.3 | 25 | 1 |
| 242 | NOT SPECIFIED | 39.3  | 5  | 146.7 | 50 | 0 |



|     |               |       |    |       |    |   |
|-----|---------------|-------|----|-------|----|---|
| 174 | NOT SPECIFIED | 50.05 | 10 | 144.3 | 5  | 1 |
| 340 | REGULAR       | 51    | 10 | 125   | 2  | 1 |
| 341 | NOT SPECIFIED | 66    | 50 | 156   | 50 | 1 |
| 383 | NOT SPECIFIED | 58.7  | 25 | 145   | 5  | 1 |
| 169 | REGULAR       | 33.1  | 2  | 137   | 10 | 0 |
| 13  | REGULAR       | 49.55 | 25 | 141   | 25 | 0 |
| 378 | REGULAR       | 39.1  | 5  | 138   | 10 | 0 |
| 137 | REGULAR       | 49.55 | 25 | 142.3 | 25 | 0 |
| 376 | NOT SPECIFIED | 40.4  | 5  | 141   | 25 | 0 |
| 148 | REGULAR       | 46    | 10 | 136   | 10 | 0 |
| 29  | NOT SPECIFIED | 47    | 2  | 143   | 2  | 1 |
| 20  | NOT SPECIFIED | 43    | 10 | 148.3 | 75 | 0 |
| 57  | NOT SPECIFIED | 41.45 | 2  | 141   | 2  | 1 |
| 382 | REGULAR       | 59.9  | 25 | 155   | 25 | 1 |
| 167 | REGULAR       | 39.2  | 5  | 127   | 2  | 0 |
| 365 | REGULAR       | 45.7  | 10 | 132   | 5  | 0 |
| 361 | REGULAR       | 44.7  | 10 | 134   | 5  | 0 |
| 369 | REGULAR       | 41    | 5  | 131   | 2  | 0 |
| 372 | REGULAR       | 41    | 5  | 146   | 50 | 0 |
| 358 | REGULAR       | 44.4  | 10 | 141.5 | 25 | 0 |
| 375 | REGULAR       | 43.1  | 5  | 137.6 | 10 | 0 |
| 385 | MOSAICISM     | 60    | 50 | 142   | 25 | 0 |
| 362 | REGULAR       | 48.65 | 10 | 134.5 | 5  | 0 |
| 370 | NOT SPECIFIED | 46    | 10 | 142   | 25 | 0 |
| 357 | REGULAR       | 60.5  | 50 | 148.6 | 75 | 0 |
| 366 | REGULAR       | 62.7  | 50 | 139.5 | 25 | 0 |
| 257 | MOSAICISM     | 40    | 2  | 146   | 5  | 1 |
| 359 | REGULAR       | 48.8  | 5  | 152   | 25 | 1 |
| 298 | REGULAR       | 49    | 5  | 154.6 | 25 | 1 |
| 326 | TRANSLOCATION | 57.8  | 25 | 144   | 2  | 1 |

| age 2_9 | age 4 groups | age 3 groups | age 11_18 | IMC        | percentile IMC | overweight_obesity | nutr |
|---------|--------------|--------------|-----------|------------|----------------|--------------------|------|
| 0       | 0            | 0            | 0         | 16.5625    | 75             | 0                  | 0    |
| 0       | 0            | 0            | 0         | 16.3114885 | 75             | 0                  | 0    |
| 0       | 0            | 0            | 0         | 16.1658393 | 50             | 0                  | 0    |
| 0       | 0            | 0            | 0         | 15.1578273 | 50             | 0                  | 0    |
| 0       | 0            | 0            | 0         | 16.6639962 | 50             | 0                  | 0    |
| 0       | 0            | 0            | 0         | 14.2746914 | 10             | 0                  | 0    |
| 0       | 0            | 0            | 0         | 15.3182629 | 50             | 0                  | 0    |
| 0       | 0            | 0            | 0         | 16.2151355 | 50             | 0                  | 0    |
| 0       | 0            | 0            | 0         | 17.1139197 | 75             | 0                  | 0    |
| 0       | 0            | 0            | 0         | 15.2360587 | 50             | 0                  | 0    |
| 0       | 0            | 0            | 0         | 16.1560738 | 75             | 0                  | 0    |
| 0       | 0            | 0            | 0         | 17.7864921 | 75             | 0                  | 0    |
| 0       | 0            | 0            | 0         | 15.7313361 | 50             | 0                  | 0    |
| 0       | 0            | 0            | 0         | 17.171444  | 75             | 0                  | 0    |
| 0       | 0            | 0            | 0         | 13.088916  | 5              | 0                  | 0    |
| 0       | 0            | 0            | 0         | 18.1122449 | 85             | 1                  | 0    |
| 0       | 0            | 0            | 0         | 14.7555556 | 25             | 0                  | 0    |
| 0       | 0            | 0            | 0         | 14.7412274 | 25             | 0                  | 0    |
| 0       | 0            | 0            | 0         | 15.1980971 | 50             | 0                  | 0    |
| 0       | 0            | 0            | 0         | 14.4424495 | 10             | 0                  | 0    |
| 0       | 0            | 0            | 0         | 12.5012976 | 5              | 0                  | 0    |
| 0       | 0            | 0            | 0         | 14.6426795 | 10             | 0                  | 0    |
| 0       | 0            | 0            | 0         | 15.4669839 | 50             | 0                  | 0    |
| 0       | 0            | 0            | 0         | 15.8277183 | 50             | 0                  | 0    |
| 0       | 0            | 0            | 0         | 15.8193618 | 50             | 0                  | 0    |
| 0       | 0            | 0            | 0         | 20.447385  | 95             | 1                  | 0    |
| 0       | 0            | 0            | 0         | 16.1454642 | 50             | 0                  | 0    |
| 0       | 0            | 0            | 0         | 15.542381  | 50             | 0                  | 0    |
| 0       | 0            | 0            | 0         | 14.8793708 | 25             | 0                  | 0    |
| 0       | 0            | 0            | 0         | 16.1808447 | 50             | 0                  | 0    |
| 0       | 0            | 0            | 0         | 15.3125    | 25             | 0                  | 0    |
| 0       | 0            | 0            | 0         | 17.2015092 | 75             | 0                  | 0    |
| 0       | 0            | 0            | 0         | 20.03125   | 95             | 1                  | 0    |
| 0       | 0            | 0            | 0         | 12.4567474 | 5              | 0                  | 0    |
| 0       | 0            | 0            | 0         | 15.4761905 | 50             | 0                  | 0    |
| 0       | 0            | 0            | 0         | 15.3329551 | 50             | 0                  | 0    |
| 0       | 0            | 0            | 0         | 14.9009284 | 25             | 0                  | 0    |
| 0       | 0            | 0            | 0         | 14.7368421 | 25             | 0                  | 0    |
| 0       | 0            | 0            | 0         | 15.6157049 | 50             | 0                  | 0    |
| 0       | 0            | 0            | 0         | 15.1363038 | 50             | 0                  | 0    |
| 0       | 0            | 0            | 0         | 15.8157632 | 50             | 0                  | 0    |
| 0       | 0            | 0            | 0         | 14.6029903 | 25             | 0                  | 0    |

|   |   |   |   |            |    |   |
|---|---|---|---|------------|----|---|
| 0 | 0 | 0 | 0 | 15.2539657 | 25 | 0 |
| 0 | 0 | 0 | 0 | 15.3344671 | 25 | 0 |
| 0 | 0 | 0 | 0 | 17.5619835 | 90 | 1 |
| 0 | 0 | 0 | 0 | 15.4938272 | 25 | 0 |
| 0 | 0 | 0 | 0 | 16.6204986 | 50 | 0 |
| 0 | 0 | 0 | 0 | 16.8001033 | 75 | 0 |
| 0 | 0 | 0 | 0 | 17.5925926 | 90 | 1 |
| 0 | 0 | 0 | 0 | 15.2986783 | 25 | 0 |
| 0 | 0 | 0 | 0 | 18.2999927 | 90 | 1 |
| 0 | 0 | 0 | 0 | 13.6346421 | 5  | 0 |
| 0 | 0 | 0 | 0 | 14.9039501 | 25 | 0 |
| 0 | 0 | 0 | 0 | 14.9513718 | 10 | 0 |
| 0 | 0 | 0 | 0 | 15         | 25 | 0 |
| 0 | 0 | 0 | 0 | 14.1366099 | 10 | 0 |
| 0 | 0 | 0 | 0 | 14.1366099 | 10 | 0 |
| 0 | 0 | 0 | 0 | 16.9172332 | 75 | 0 |
| 0 | 0 | 0 | 0 | 16.7276859 | 75 | 0 |
| 0 | 0 | 0 | 0 | 16.7871901 | 75 | 0 |
| 0 | 0 | 0 | 0 | 16.953125  | 75 | 0 |
| 0 | 0 | 0 | 0 | 16.5536332 | 75 | 0 |
| 0 | 0 | 0 | 0 | 16.3126702 | 75 | 0 |
| 0 | 0 | 0 | 0 | 13.4894331 | 10 | 0 |
| 0 | 0 | 0 | 0 | 15.83391   | 25 | 0 |
| 0 | 0 | 0 | 0 | 15.7136106 | 50 | 0 |
| 0 | 0 | 0 | 0 | 14.273567  | 10 | 0 |
| 0 | 0 | 0 | 0 | 14.6813828 | 10 | 0 |
| 0 | 0 | 0 | 0 | 14.532872  | 10 | 0 |
| 0 | 0 | 0 | 0 | 15.4405474 | 50 | 0 |
| 0 | 0 | 0 | 0 | 16.9110847 | 75 | 0 |
| 0 | 0 | 0 | 0 | 16.418083  | 75 | 0 |
| 0 | 0 | 0 | 0 | 16.0765852 | 50 | 0 |
| 0 | 0 | 0 | 0 | 13.7142857 | 10 | 0 |
| 0 | 0 | 0 | 0 | 15.9349174 | 50 | 0 |
| 0 | 0 | 0 | 0 | 16.4174771 | 50 | 0 |
| 0 | 0 | 0 | 0 | 12.4786704 | 5  | 0 |
| 0 | 0 | 0 | 0 | 16.7871901 | 75 | 0 |
| 0 | 0 | 0 | 0 | 20.265812  | 95 | 1 |
| 0 | 0 | 0 | 0 | 19.0217391 | 95 | 1 |
| 0 | 0 | 0 | 0 | 17.852127  | 85 | 1 |
| 0 | 0 | 0 | 0 | 16.1868424 | 75 | 0 |
| 0 | 0 | 0 | 0 | 16.7448988 | 75 | 0 |
| 0 | 0 | 0 | 0 | 15.1282119 | 25 | 0 |
| 0 | 0 | 0 | 0 | 16.2388205 | 50 | 0 |
| 0 | 0 | 0 | 0 | 14.6233029 | 25 | 0 |
| 0 | 0 | 0 | 0 | 12.5943246 | 5  | 0 |

|   |   |   |   |            |    |   |
|---|---|---|---|------------|----|---|
| 0 | 0 | 0 | 0 | 17.3964402 | 85 | 1 |
| 0 | 0 | 0 | 0 | 18.192929  | 90 | 1 |
| 0 | 0 | 0 | 0 | 16.0123967 | 50 | 0 |
| 0 | 0 | 0 | 0 | 15.899797  | 50 | 0 |
| 0 | 0 | 0 | 0 | 16.6587902 | 75 | 0 |
| 0 | 0 | 0 | 0 | 18.4732291 | 90 | 1 |
| 0 | 0 | 0 | 0 | 19.0470376 | 95 | 1 |
| 0 | 0 | 0 | 0 | 16.0769628 | 50 | 0 |
| 0 | 0 | 0 | 0 | 13.6880165 | 10 | 0 |
| 0 | 0 | 0 | 0 | 13.3888311 | 5  | 0 |
| 0 | 0 | 0 | 0 | 16.1595758 | 50 | 0 |
| 0 | 0 | 0 | 0 | 14.9150191 | 25 | 0 |
| 0 | 0 | 0 | 0 | 14.3586006 | 10 | 0 |
| 0 | 0 | 0 | 0 | 15.8267389 | 50 | 0 |
| 0 | 0 | 0 | 0 | 18.935025  | 95 | 1 |
| 0 | 0 | 0 | 0 | 17.5       | 85 | 1 |
| 0 | 0 | 0 | 0 | 14.8822997 | 25 | 0 |
| 0 | 0 | 0 | 0 | 13.9369473 | 10 | 0 |
| 0 | 0 | 0 | 0 | 13.9781655 | 10 | 0 |
| 0 | 0 | 0 | 0 | 18.3163783 | 90 | 1 |
| 0 | 0 | 0 | 0 | 16.296967  | 50 | 0 |
| 0 | 0 | 0 | 0 | 15.9876543 | 50 | 0 |
| 0 | 0 | 0 | 0 | 19.605921  | 95 | 1 |
| 0 | 0 | 0 | 0 | 15.530588  | 50 | 0 |
| 0 | 0 | 0 | 0 | 19.6921684 | 95 | 1 |
| 0 | 0 | 0 | 0 | 14.6260388 | 25 | 0 |
| 0 | 0 | 0 | 0 | 17.2532781 | 75 | 0 |
| 0 | 0 | 0 | 0 | 14.2142927 | 5  | 0 |
| 0 | 0 | 0 | 0 | 16.1179792 | 50 | 0 |
| 0 | 0 | 0 | 0 | 17.0898438 | 75 | 0 |
| 0 | 0 | 0 | 0 | 14.7271532 | 25 | 0 |
| 0 | 0 | 0 | 0 | 14.1833423 | 5  | 0 |
| 0 | 1 | 0 | 0 | 16.7313019 | 75 | 0 |
| 0 | 1 | 0 | 0 | 15.6       | 50 | 0 |
| 0 | 1 | 0 | 0 | 14.5124717 | 25 | 0 |
| 0 | 1 | 0 | 0 | 14.594184  | 25 | 0 |
| 0 | 1 | 0 | 0 | 18.1018071 | 85 | 1 |
| 0 | 1 | 0 | 0 | 13.8165586 | 10 | 0 |
| 0 | 1 | 0 | 0 | 15.4570704 | 50 | 0 |
| 0 | 1 | 0 | 0 | 14.3261815 | 25 | 0 |
| 0 | 1 | 0 | 0 | 15.4199677 | 50 | 0 |
| 0 | 1 | 0 | 0 | 16.2610267 | 75 | 0 |
| 0 | 1 | 0 | 0 | 17.9584121 | 85 | 1 |
| 0 | 1 | 0 | 0 | 16.3069113 | 75 | 0 |
| 0 | 1 | 0 | 0 | 16.8350168 | 75 | 0 |

|   |   |   |   |            |    |   |
|---|---|---|---|------------|----|---|
| 0 | 1 | 0 | 0 | 14.9519402 | 25 | 0 |
| 0 | 1 | 0 | 0 | 14.3229167 | 25 | 0 |
| 0 | 1 | 0 | 0 | 14.8760331 | 25 | 0 |
| 0 | 1 | 0 | 0 | 14.3123223 | 25 | 0 |
| 0 | 1 | 0 | 0 | 18.314599  | 75 | 0 |
| 0 | 1 | 0 | 0 | 16.0187736 | 50 | 0 |
| 0 | 1 | 0 | 0 | 16.1547455 | 75 | 0 |
| 0 | 1 | 0 | 0 | 15.0422914 | 25 | 0 |
| 0 | 1 | 0 | 0 | 21.3992488 | 95 | 1 |
| 0 | 1 | 0 | 0 | 13.1698475 | 5  | 0 |
| 0 | 1 | 0 | 0 | 14.6102366 | 25 | 0 |
| 0 | 1 | 0 | 0 | 15.3939082 | 50 | 0 |
| 0 | 1 | 0 | 0 | 16.9101069 | 75 | 0 |
| 0 | 1 | 0 | 0 | 16.9898947 | 75 | 0 |
| 0 | 1 | 0 | 0 | 18.7054947 | 85 | 1 |
| 0 | 1 | 0 | 0 | 14.7125396 | 25 | 0 |
| 0 | 1 | 0 | 0 | 16.0276007 | 75 | 0 |
| 0 | 1 | 0 | 0 | 16.7201817 | 75 | 0 |
| 0 | 1 | 0 | 0 | 15.4335218 | 50 | 0 |
| 0 | 1 | 0 | 0 | 16.0235969 | 50 | 0 |
| 0 | 1 | 0 | 0 | 16.1588181 | 75 | 0 |
| 0 | 1 | 0 | 0 | 15.2189391 | 50 | 0 |
| 0 | 1 | 0 | 0 | 15.2189391 | 25 | 0 |
| 0 | 1 | 0 | 0 | 13.7241447 | 10 | 0 |
| 0 | 1 | 0 | 0 | 16.5986395 | 75 | 0 |
| 0 | 1 | 0 | 0 | 18.0978415 | 85 | 1 |
| 0 | 1 | 0 | 0 | 15.8       | 50 | 0 |
| 0 | 1 | 0 | 0 | 16.6662851 | 75 | 0 |
| 0 | 1 | 0 | 0 | 18.3041838 | 85 | 1 |
| 0 | 1 | 0 | 0 | 21.1256378 | 95 | 1 |
| 0 | 1 | 0 | 0 | 15.9876543 | 50 | 0 |
| 0 | 1 | 0 | 0 | 15.1675462 | 25 | 0 |
| 0 | 1 | 0 | 0 | 15.8099112 | 50 | 0 |
| 0 | 1 | 0 | 0 | 13.0142371 | 10 | 0 |
| 0 | 1 | 0 | 0 | 17.8363289 | 75 | 0 |
| 0 | 1 | 0 | 0 | 13.770214  | 10 | 0 |
| 0 | 1 | 0 | 0 | 14.3995978 | 10 | 0 |
| 0 | 1 | 0 | 0 | 13.7174211 | 10 | 0 |
| 0 | 1 | 0 | 0 | 16.1497351 | 50 | 0 |
| 0 | 1 | 0 | 0 | 14.6097655 | 25 | 0 |
| 0 | 1 | 0 | 0 | 17.2049212 | 75 | 0 |
| 0 | 1 | 0 | 0 | 14.3045889 | 10 | 0 |
| 0 | 1 | 0 | 0 | 15.6201908 | 25 | 0 |
| 0 | 1 | 0 | 0 | 15.5432268 | 25 | 0 |
| 0 | 1 | 0 | 0 | 17.3709402 | 75 | 0 |

|   |   |   |   |            |    |   |
|---|---|---|---|------------|----|---|
| 0 | 1 | 0 | 0 | 12.7509962 | 5  | 0 |
| 0 | 1 | 0 | 0 | 17.4391707 | 75 | 0 |
| 0 | 1 | 0 | 0 | 15.9829238 | 50 | 0 |
| 0 | 1 | 0 | 0 | 17.3834314 | 75 | 0 |
| 0 | 1 | 0 | 0 | 18.4203814 | 85 | 1 |
| 0 | 1 | 0 | 0 | 14.4768959 | 25 | 0 |
| 0 | 1 | 0 | 0 | 19.2239231 | 90 | 1 |
| 0 | 1 | 0 | 0 | 18.7603306 | 90 | 1 |
| 0 | 1 | 0 | 0 | 17.6977532 | 75 | 0 |
| 0 | 1 | 0 | 0 | 17.1487603 | 75 | 0 |
| 0 | 1 | 0 | 0 | 18.3724158 | 90 | 1 |
| 0 | 1 | 0 | 0 | 17.0181756 | 75 | 0 |
| 0 | 1 | 0 | 0 | 14.9519402 | 25 | 0 |
| 0 | 1 | 0 | 0 | 18.175583  | 85 | 1 |
| 0 | 1 | 0 | 0 | 16.3947732 | 50 | 0 |
| 0 | 1 | 0 | 0 | 16.3636364 | 50 | 0 |
| 0 | 1 | 0 | 0 | 16.9865806 | 75 | 0 |
| 0 | 1 | 0 | 0 | 16.1451247 | 50 | 0 |
| 0 | 1 | 0 | 0 | 17.7999288 | 75 | 0 |
| 0 | 1 | 0 | 0 | 14.9055097 | 25 | 0 |
| 0 | 1 | 0 | 0 | 14.1065485 | 10 | 0 |
| 0 | 1 | 0 | 0 | 17.7285319 | 75 | 0 |
| 0 | 1 | 0 | 0 | 13.7975814 | 5  | 0 |
| 0 | 1 | 0 | 0 | 20.9625295 | 95 | 1 |
| 0 | 1 | 0 | 0 | 16.5245555 | 50 | 0 |
| 0 | 1 | 0 | 0 | 16.3265306 | 50 | 0 |
| 0 | 1 | 0 | 0 | 16.0743802 | 50 | 0 |
| 0 | 2 | 1 | 0 | 14.4628099 | 10 | 0 |
| 0 | 2 | 1 | 0 | 15.9436943 | 25 | 0 |
| 0 | 2 | 1 | 0 | 20.9598976 | 85 | 1 |
| 0 | 2 | 1 | 0 | 15.6865735 | 25 | 0 |
| 0 | 2 | 1 | 0 | 20.9451796 | 85 | 1 |
| 0 | 2 | 1 | 0 | 13.7282587 | 5  | 0 |
| 0 | 2 | 1 | 0 | 14.2000767 | 5  | 0 |
| 0 | 2 | 1 | 0 | 15.0123457 | 25 | 0 |
| 0 | 2 | 1 | 0 | 16.7107273 | 50 | 0 |
| 0 | 2 | 1 | 0 | 13.6352159 | 5  | 0 |
| 0 | 2 | 1 | 0 | 16.5182419 | 50 | 0 |
| 0 | 2 | 1 | 0 | 18.4675981 | 75 | 0 |
| 0 | 2 | 1 | 0 | 16.3127116 | 50 | 0 |
| 0 | 2 | 1 | 0 | 15.879017  | 25 | 0 |
| 0 | 2 | 1 | 0 | 18.9769126 | 85 | 1 |
| 0 | 2 | 1 | 0 | 15.879017  | 25 | 0 |
| 0 | 2 | 1 | 0 | 20.2528009 | 75 | 0 |
| 0 | 2 | 1 | 0 | 13.4027778 | 5  | 0 |

|   |   |   |   |            |    |   |
|---|---|---|---|------------|----|---|
| 0 | 2 | 1 | 0 | 14.4175317 | 10 | 0 |
| 0 | 2 | 1 | 0 | 17.0891886 | 50 | 0 |
| 0 | 2 | 1 | 0 | 14.5469953 | 10 | 0 |
| 0 | 2 | 1 | 0 | 18.2880946 | 75 | 0 |
| 0 | 2 | 1 | 0 | 16.0619803 | 25 | 0 |
| 0 | 2 | 1 | 0 | 18.6011342 | 75 | 0 |
| 0 | 2 | 1 | 0 | 15.0430902 | 10 | 0 |
| 0 | 2 | 1 | 0 | 16.9441141 | 50 | 0 |
| 0 | 2 | 1 | 0 | 19.8274649 | 75 | 0 |
| 0 | 2 | 1 | 0 | 15.9989922 | 25 | 0 |
| 0 | 2 | 1 | 0 | 18.6000372 | 75 | 0 |
| 0 | 2 | 1 | 0 | 15.7790316 | 25 | 0 |
| 0 | 2 | 1 | 0 | 19.6527778 | 75 | 0 |
| 0 | 2 | 1 | 0 | 17.7953534 | 50 | 0 |
| 0 | 2 | 1 | 0 | 22.784     | 90 | 1 |
| 0 | 2 | 1 | 0 | 16.7965601 | 50 | 0 |
| 0 | 2 | 1 | 0 | 17.6366843 | 50 | 0 |
| 0 | 2 | 1 | 0 | 17.2435586 | 50 | 0 |
| 0 | 2 | 1 | 0 | 19.2200384 | 75 | 0 |
| 0 | 2 | 1 | 0 | 18.0866738 | 75 | 0 |
| 0 | 2 | 1 | 0 | 16.0299414 | 25 | 0 |
| 0 | 2 | 1 | 0 | 16.5182419 | 50 | 0 |
| 0 | 2 | 1 | 0 | 19.392     | 75 | 0 |
| 0 | 2 | 1 | 0 | 14.120747  | 5  | 0 |
| 0 | 2 | 1 | 0 | 18.9594356 | 75 | 0 |
| 0 | 2 | 1 | 0 | 21.0800422 | 85 | 1 |
| 0 | 2 | 1 | 0 | 17.5356087 | 50 | 0 |
| 0 | 2 | 1 | 0 | 20.7756233 | 75 | 0 |
| 0 | 2 | 1 | 0 | 16.4100378 | 50 | 0 |
| 0 | 2 | 1 | 0 | 17.5053863 | 50 | 0 |
| 0 | 2 | 1 | 0 | 14.674784  | 10 | 0 |
| 0 | 2 | 1 | 0 | 22.8390525 | 90 | 1 |
| 1 | 2 | 1 | 0 | 23.8683128 | 95 | 1 |
| 1 | 2 | 1 | 0 | 18.7890593 | 75 | 0 |
| 1 | 2 | 1 | 0 | 14.3405307 | 10 | 0 |
| 1 | 2 | 1 | 0 | 16.5597668 | 25 | 0 |
| 1 | 2 | 1 | 0 | 16.224     | 25 | 0 |
| 1 | 2 | 1 | 0 | 18.5790725 | 75 | 0 |
| 1 | 2 | 1 | 0 | 14.5794141 | 10 | 0 |
| 1 | 2 | 1 | 0 | 22.993219  | 75 | 0 |
| 1 | 2 | 1 | 0 | 18.0688841 | 50 | 0 |
| 1 | 2 | 1 | 0 | 19.1066565 | 75 | 0 |
| 1 | 2 | 1 | 0 | 20.3017833 | 75 | 0 |
| 1 | 2 | 1 | 0 | 17.9849305 | 50 | 0 |
| 1 | 2 | 1 | 0 | 21.536     | 75 | 0 |

|   |   |   |   |            |    |   |
|---|---|---|---|------------|----|---|
| 1 | 2 | 1 | 0 | 20.6298828 | 75 | 0 |
| 1 | 2 | 1 | 0 | 25.4040584 | 95 | 1 |
| 1 | 2 | 1 | 0 | 17.1045786 | 50 | 0 |
| 1 | 2 | 1 | 0 | 17.1045786 | 50 | 0 |
| 1 | 2 | 1 | 0 | 14.6207937 | 10 | 0 |
| 1 | 3 | 2 | 1 | 22.6699893 | 90 | 1 |
| 1 | 3 | 2 | 1 | 19.9971879 | 75 | 0 |
| 1 | 3 | 2 | 1 | 18.5803455 | 50 | 0 |
| 1 | 3 | 2 | 1 | 17.1957672 | 25 | 0 |
| 1 | 3 | 2 | 1 | 27.086414  | 95 | 1 |
| 1 | 3 | 2 | 1 | 22.136954  | 85 | 1 |
| 1 | 3 | 2 | 1 | 19.5901689 | 75 | 0 |
| 1 | 3 | 2 | 1 | 16.9526627 | 25 | 0 |
| 1 | 3 | 2 | 1 | 18.6004162 | 75 | 0 |
| 1 | 3 | 2 | 1 | 13.6094675 | 5  | 0 |
| 1 | 3 | 2 | 1 | 19.7666365 | 75 | 0 |
| 1 | 3 | 2 | 1 | 22.8099129 | 90 | 1 |
| 1 | 3 | 2 | 1 | 21.2637741 | 75 | 0 |
| 1 | 3 | 2 | 1 | 23.4319527 | 90 | 1 |
| 1 | 3 | 2 | 1 | 24.556213  | 95 | 1 |
| 1 | 3 | 2 | 1 | 20.1758926 | 85 | 1 |
| 1 | 3 | 2 | 1 | 18.1683296 | 50 | 0 |
| 1 | 3 | 2 | 1 | 14.5423953 | 10 | 0 |
| 1 | 3 | 2 | 1 | 18.5732797 | 50 | 0 |
| 1 | 3 | 2 | 1 | 20.3022385 | 75 | 0 |
| 1 | 3 | 2 | 1 | 21.3017751 | 75 | 0 |
| 1 | 3 | 2 | 1 | 19.8199158 | 75 | 0 |
| 1 | 3 | 2 | 1 | 16.184573  | 10 | 0 |
| 1 | 3 | 2 | 1 | 17.7934952 | 25 | 0 |
| 1 | 3 | 2 | 1 | 16.3001543 | 10 | 0 |
| 1 | 3 | 2 | 1 | 16.196955  | 10 | 0 |
| 1 | 3 | 2 | 1 | 17.3029526 | 10 | 0 |
| 1 | 3 | 2 | 1 | 17.6923077 | 10 | 0 |
| 1 | 3 | 2 | 1 | 21.4274623 | 75 | 0 |
| 1 | 3 | 2 | 1 | 20.2140309 | 75 | 0 |
| 1 | 3 | 2 | 1 | 15.8730159 | 10 | 0 |
| 1 | 3 | 2 | 1 | 24.1088867 | 85 | 1 |
| 1 | 3 | 2 | 1 | 17.7915519 | 25 | 0 |
| 1 | 3 | 2 | 1 | 19.7057175 | 50 | 0 |
| 1 | 3 | 2 | 1 | 19.9437557 | 50 | 0 |
| 1 | 3 | 2 | 1 | 21.0059172 | 75 | 0 |
| 1 | 3 | 2 | 1 | 17.4814987 | 10 | 0 |
| 1 | 3 | 2 | 1 | 19.2263545 | 50 | 0 |
| 1 | 3 | 2 | 1 | 17.9075777 | 25 | 0 |
| 1 | 3 | 2 | 1 | 23.4565585 | 75 | 0 |



|   |   |   |   |            |    |   |
|---|---|---|---|------------|----|---|
| 1 | 3 | 2 | 1 | 21.7450286 | 50 | 0 |
| 1 | 3 | 2 | 1 | 25.854109  | 75 | 0 |
| 1 | 3 | 2 | 1 | 27.8784791 | 85 | 1 |
| 1 | 3 | 2 | 1 | 18.3784919 | 25 | 0 |
| 1 | 3 | 2 | 1 | 23.8048006 | 75 | 0 |
| 1 | 3 | 2 | 1 | 17.4202815 | 10 | 0 |
| 1 | 3 | 2 | 1 | 21.0566653 | 75 | 0 |
| 1 | 3 | 2 | 1 | 22.6835832 | 75 | 0 |
| 1 | 3 | 2 | 1 | 22.7040816 | 50 | 0 |
| 1 | 3 | 2 | 1 | 23.556834  | 50 | 0 |
| 1 | 3 | 2 | 1 | 23.2928241 | 50 | 0 |
| 1 | 3 | 2 | 1 | 20.608     | 50 | 0 |
| 1 | 3 | 2 | 1 | 23.8821019 | 75 | 0 |
| 1 | 3 | 2 | 1 | 17.5561711 | 10 | 0 |
| 1 | 3 | 2 | 1 | 21.1248285 | 50 | 0 |
| 1 | 3 | 2 | 1 | 21.1248285 | 50 | 0 |
| 1 | 3 | 2 | 1 | 19.5266272 | 25 | 0 |
| 1 | 3 | 2 | 1 | 16.9859657 | 10 | 0 |
| 1 | 3 | 2 | 1 | 20.6811541 | 50 | 0 |
| 1 | 3 | 2 | 1 | 32.5368169 | 95 | 1 |
| 1 | 3 | 2 | 1 | 26.611797  | 85 | 1 |
| 1 | 3 | 2 | 1 | 24.0640474 | 75 | 0 |
| 1 | 3 | 2 | 1 | 24.14119   | 75 | 0 |
| 1 | 3 | 2 | 1 | 27.2242638 | 85 | 1 |
| 1 | 3 | 2 | 1 | 25.1239669 | 50 | 0 |
| 1 | 3 | 2 | 1 | 25.274859  | 50 | 0 |
| 1 | 3 | 2 | 1 | 24.5949074 | 50 | 0 |
| 1 | 3 | 2 | 1 | 18.9998123 | 10 | 0 |
| 1 | 3 | 2 | 1 | 26.4625608 | 75 | 0 |
| 1 | 3 | 2 | 1 | 14.8412148 | 5  | 0 |
| 1 | 3 | 2 | 1 | 25.7887517 | 85 | 1 |
| 1 | 3 | 2 | 1 | 22.1685343 | 25 | 0 |
| 1 | 3 | 2 | 1 | 24.7654566 | 50 | 0 |
| 1 | 3 | 2 | 1 | 19.5398101 | 10 | 0 |
| 1 | 3 | 2 | 1 | 21.9706981 | 25 | 0 |
| 1 | 3 | 2 | 1 | 20.3332672 | 25 | 0 |
| 1 | 3 | 2 | 1 | 27.8067398 | 75 | 0 |
| 1 | 3 | 2 | 1 | 25.7690542 | 75 | 0 |
| 1 | 3 | 2 | 1 | 30.4271979 | 90 | 1 |
| 1 | 3 | 2 | 1 | 20.661157  | 25 | 0 |
| 1 | 3 | 2 | 1 | 21.7360285 | 25 | 0 |
| 1 | 3 | 2 | 1 | 24.8601466 | 75 | 0 |
| 1 | 3 | 2 | 1 | 29.6158997 | 90 | 1 |
| 1 | 3 | 2 | 1 | 18.2613266 | 10 | 0 |
| 1 | 3 | 2 | 1 | 24.0365105 | 50 | 0 |

|   |   |   |   |            |    |   |
|---|---|---|---|------------|----|---|
| 1 | 3 | 2 | 1 | 32.64      | 95 | 1 |
| 1 | 3 | 2 | 1 | 27.1203156 | 75 | 0 |
| 1 | 3 | 2 | 1 | 27.9191439 | 90 | 1 |
| 1 | 3 | 2 | 1 | 17.6354627 | 5  | 0 |
| 1 | 3 | 2 | 1 | 24.9232936 | 75 | 0 |
| 1 | 3 | 2 | 1 | 20.531401  | 25 | 0 |
| 1 | 3 | 2 | 1 | 24.4699938 | 75 | 0 |
| 1 | 3 | 2 | 1 | 20.3209094 | 25 | 0 |
| 1 | 3 | 2 | 1 | 24.8702422 | 75 | 0 |
| 1 | 3 | 2 | 1 | 22.984009  | 50 | 0 |
| 1 | 3 | 2 | 1 | 19.5517733 | 25 | 0 |
| 1 | 3 | 2 | 1 | 20.8490519 | 50 | 0 |
| 1 | 3 | 2 | 1 | 24.9323621 | 75 | 0 |
| 1 | 3 | 2 | 1 | 24.3040486 | 75 | 0 |
| 1 | 3 | 2 | 1 | 26.228191  | 75 | 0 |
| 1 | 3 | 2 | 1 | 24.8941858 | 50 | 0 |
| 1 | 3 | 2 | 1 | 23.8913816 | 50 | 0 |
| 1 | 3 | 2 | 1 | 19.2343779 | 10 | 0 |
| 1 | 3 | 2 | 1 | 22.1753299 | 50 | 0 |
| 1 | 3 | 2 | 1 | 22.7635715 | 50 | 0 |
| 1 | 3 | 2 | 1 | 29.7560008 | 85 | 1 |
| 1 | 3 | 2 | 1 | 26.8929396 | 75 | 0 |
| 1 | 3 | 2 | 1 | 22.8129339 | 50 | 0 |
| 1 | 3 | 2 | 1 | 27.3979303 | 75 | 0 |
| 1 | 3 | 2 | 1 | 32.2195244 | 95 | 1 |
| 1 | 3 | 2 | 1 | 18.7652468 | 10 | 0 |
| 1 | 3 | 2 | 1 | 21.1218837 | 50 | 0 |
| 1 | 3 | 2 | 1 | 20.501097  | 25 | 0 |
| 1 | 3 | 2 | 1 | 27.8742284 | 90 | 1 |

| nutrition | waist | waist/length<br>index | central obesity | CT | TG  | LDLC | HDLC |    |
|-----------|-------|-----------------------|-----------------|----|-----|------|------|----|
| 1         |       |                       |                 |    | 96  | 64   | 54   | 30 |
| 1         |       |                       |                 |    | 178 | 99   | 110  | 49 |
| 1         |       |                       |                 |    | 144 | 67   | 91   | 39 |
| 1         |       |                       |                 |    | 180 | 88   | 116  | 46 |
| 1         |       |                       |                 |    | 184 | 111  | 108  | 54 |
| 1         |       |                       |                 |    | 114 | 50   | 88   | 16 |
| 1         |       |                       |                 |    | 149 | 76   | 103  | 31 |
| 1         |       |                       |                 |    | 146 | 92   | 98   | 30 |
| 1         | 57    | 0.75                  |                 | 1  | 201 | 70   | 149  | 38 |
| 1         |       |                       |                 |    | 160 | 95   | 84   | 57 |
| 1         | 47    | 0.580246914           |                 | 1  | 196 | 101  | 137  | 39 |
| 1         | 48    | 0.568047337           |                 | 1  | 100 | 53   | 60   | 30 |
| 1         |       |                       |                 |    | 154 | 57   | 95   | 48 |
| 1         |       |                       |                 |    | 169 | 120  | 105  | 40 |
| 0         |       |                       |                 |    | 129 | 217  | 61   | 25 |
| 2         |       |                       |                 |    | 180 | 50   | 110  | 60 |
| 1         |       |                       |                 |    | 182 | 68   | 126  | 43 |
| 1         |       |                       |                 |    | 182 | 86   | 124  | 41 |
| 1         |       |                       |                 |    | 180 | 84   | 116  | 48 |
| 1         |       |                       |                 |    | 118 | 60   | 77   | 29 |
| 0         |       |                       |                 |    | 115 | 85   | 60   | 38 |
| 1         |       |                       |                 |    | 150 | 115  | 89   | 39 |
| 1         | 42    | 0.512195122           |                 | 1  | 218 | 53   | 145  | 62 |
| 1         |       |                       |                 |    | 211 | 107  | 146  | 44 |
| 1         |       |                       |                 |    | 146 | 46   | 82   | 55 |
| 3         |       |                       |                 |    | 96  | 63   | 58   | 26 |
| 1         |       |                       |                 |    | 138 | 82   | 85   | 37 |
| 1         |       |                       |                 |    | 104 | 87   | 59   | 28 |
| 1         |       |                       |                 |    | 142 | 76   | 97   | 30 |
| 1         |       |                       |                 |    | 117 | 126  | 64   | 28 |
| 1         |       |                       |                 |    | 172 | 97   | 103  | 50 |
| 1         |       |                       |                 |    | 179 | 116  | 129  | 27 |
| 3         |       |                       |                 |    | 137 | 67   | 86   | 38 |
| 0         | 41    | 0.482352941           |                 | 0  | 103 | 119  | 59   | 21 |
| 1         |       |                       |                 |    | 101 | 122  | 59   | 18 |
| 1         | 43    | 0.507674144           |                 | 1  | 186 | 145  | 126  | 31 |
| 1         |       |                       |                 |    | 163 | 58   | 111  | 41 |
| 1         |       |                       |                 |    | 184 | 115  | 118  | 43 |
| 1         |       |                       |                 |    | 141 | 79   | 96   | 29 |
| 1         |       |                       |                 |    | 133 | 81   | 97   | 20 |
| 1         |       |                       |                 |    | 109 | 89   | 59   | 32 |
| 1         |       |                       |                 |    | 192 | 93   | 137  | 36 |
| 1         | 47    | 0.494736842           |                 | 0  | 120 | 41   | 65   | 47 |

|   |      |             |   |     |     |     |    |
|---|------|-------------|---|-----|-----|-----|----|
| 1 | 44   | 0.523809524 | 1 | 164 | 63  | 114 | 37 |
| 2 | 57   | 0.647727273 | 1 | 142 | 70  | 94  | 34 |
| 1 | 45.5 | 0.505555556 | 1 | 138 | 74  | 81  | 42 |
| 1 |      |             |   | 165 | 114 | 33  | 33 |
| 1 |      |             |   | 182 | 71  | 112 | 56 |
| 2 |      |             |   | 136 | 76  | 77  | 44 |
| 1 |      |             |   | 146 | 66  | 96  | 37 |
| 2 |      |             |   | 175 | 91  | 122 | 34 |
| 0 |      |             |   | 197 | 126 | 135 | 37 |
| 1 | 47   | 0.544611819 | 1 | 218 | 80  | 146 | 56 |
| 1 |      |             |   | 195 | 101 | 116 | 58 |
| 1 |      |             |   | 171 | 53  | 123 | 37 |
| 1 |      |             |   | 169 | 42  | 124 | 37 |
| 1 |      |             |   | 169 | 42  | 124 | 37 |
| 1 | 52   | 0.587570621 | 1 | 161 | 80  | 112 | 32 |
| 1 |      |             |   | 131 | 135 | 69  | 35 |
| 1 |      |             |   | 172 | 87  | 115 | 40 |
| 1 | 47   | 0.5875      | 1 | 140 | 54  | 80  | 50 |
| 1 | 51   | 0.6         | 1 | 147 | 74  | 98  | 34 |
| 1 |      |             |   | 145 | 74  | 97  | 33 |
| 1 |      |             |   | 249 | 206 | 171 | 37 |
| 1 | 51   | 0.6         | 1 | 148 | 64  | 102 | 33 |
| 1 |      |             |   | 142 | 119 | 84  | 35 |
| 1 |      |             |   | 157 | 69  | 103 | 41 |
| 1 |      |             |   | 200 | 69  | 149 | 37 |
| 1 | 45   | 0.529411765 | 1 | 110 | 68  | 69  | 28 |
| 1 |      |             |   | 158 | 102 | 97  | 40 |
| 1 | 49   | 0.371212121 | 0 | 117 | 122 | 43  | 50 |
| 1 |      |             |   | 198 | 83  | 140 | 42 |
| 1 |      |             |   | 190 | 160 | 126 | 32 |
| 1 |      |             |   | 171 | 120 | 106 | 41 |
| 1 | 53   | 0.602272727 | 1 | 127 | 91  | 78  | 31 |
| 1 |      |             |   | 172 | 53  | 112 | 49 |
| 0 |      |             |   | 149 | 38  | 87  | 55 |
| 1 |      |             |   | 129 | 63  | 80  | 36 |
| 3 | 63   | 0.611650485 | 1 | 170 | 122 | 122 | 24 |
| 3 |      |             |   | 117 | 66  | 68  | 36 |
| 2 | 56   | 0.647398844 | 1 | 192 | 65  | 131 | 48 |
| 1 | 49.5 | 0.532258065 | 1 | 205 | 138 | 132 | 45 |
| 1 |      |             |   | 118 | 53  | 78  | 29 |
| 1 | 45   | 0.505050505 | 1 | 182 | 159 | 114 | 37 |
| 1 |      |             |   | 109 | 85  | 68  | 24 |
| 1 |      |             |   | 176 | 59  | 113 | 51 |
| 0 | 41   | 0.422680412 | 0 | 162 | 79  | 100 | 47 |
| 2 |      |             |   | 150 | 83  | 94  | 40 |

|   |      |              |   |     |     |     |    |
|---|------|--------------|---|-----|-----|-----|----|
| 2 |      |              |   | 152 | 128 | 89  | 38 |
| 1 | 46   | 0.3194444444 | 0 | 183 | 51  | 136 | 37 |
| 1 |      |              |   | 182 | 100 | 117 | 45 |
| 1 |      |              |   | 161 | 32  | 78  | 77 |
| 2 | 66   | 0.647058824  | 1 | 188 | 89  | 135 | 36 |
| 3 |      |              |   | 214 | 92  | 153 | 43 |
| 1 |      |              |   | 116 | 67  | 72  | 30 |
| 1 |      |              |   | 189 | 59  | 120 | 57 |
| 0 |      |              |   | 142 | 117 | 85  | 34 |
| 1 |      |              |   | 163 | 82  | 102 | 45 |
| 1 |      |              |   | 139 | 79  | 86  | 37 |
| 1 |      |              |   | 167 | 46  | 121 | 37 |
| 1 |      |              |   | 194 | 161 | 128 | 34 |
| 3 | 59   | 0.437037037  | 0 | 118 | 55  | 57  | 50 |
| 2 |      |              |   | 194 | 93  | 132 | 44 |
| 1 |      |              |   | 166 | 61  | 110 | 44 |
| 1 |      |              |   | 153 | 66  | 90  | 50 |
| 1 |      |              |   | 148 | 105 | 94  | 33 |
| 2 |      |              |   | 186 | 52  | 126 | 49 |
| 1 |      |              |   | 157 | 79  | 89  | 52 |
| 1 | 51.5 | 0.572222222  | 1 | 121 | 81  | 76  | 28 |
| 3 |      |              |   | 192 | 122 | 131 | 37 |
| 1 |      |              |   | 133 | 113 | 71  | 40 |
| 3 |      |              |   | 171 | 53  | 108 | 52 |
| 1 |      |              |   | 182 | 117 | 121 | 38 |
| 1 |      |              |   | 206 | 132 | 141 | 39 |
| 0 |      |              |   | 154 | 48  | 100 | 44 |
| 1 |      |              |   | 162 | 64  | 111 | 38 |
| 1 | 53   | 0.552083333  | 1 | 101 | 68  | 57  | 30 |
| 1 |      |              |   | 135 | 79  | 76  | 44 |
| 0 |      |              |   | 168 | 99  | 115 | 34 |
| 1 | 51   | 0.536842105  | 1 | 150 | 41  | 97  | 45 |
| 1 |      |              |   | 136 | 65  | 93  | 30 |
| 1 |      |              |   | 146 | 71  | 85  | 46 |
| 1 |      |              |   | 156 | 74  | 100 | 41 |
| 2 |      |              |   | 176 | 97  | 111 | 46 |
| 1 | 51.5 | 0.530927835  | 1 | 128 | 33  | 61  | 61 |
| 1 | 50   | 0.549450549  | 1 | 139 | 116 | 86  | 30 |
| 1 |      |              |   | 154 | 96  | 82  | 53 |
| 1 |      |              |   | 162 | 74  | 94  | 53 |
| 1 |      |              |   | 179 | 129 | 119 | 34 |
| 2 |      |              |   | 135 | 63  | 85  | 37 |
| 1 | 54   | 0.495412844  | 0 | 152 | 81  | 99  | 37 |
| 1 |      |              |   | 200 | 63  | 127 | 60 |
| 1 |      |              |   | 145 | 81  | 86  | 43 |

|   |      |             |   |     |     |     |    |
|---|------|-------------|---|-----|-----|-----|----|
| 1 | 50   | 0.520833333 | 1 | 184 | 84  | 117 | 50 |
| 1 | 48   | 0.436363636 | 0 | 165 | 87  | 106 | 42 |
| 1 | 51   | 0.504950495 | 1 | 167 | 97  | 102 | 45 |
| 1 |      |             |   | 196 | 70  | 126 | 56 |
| 1 | 53.5 | 0.469298246 | 0 | 103 | 58  | 72  | 19 |
| 1 |      |             |   | 138 | 25  | 73  | 60 |
| 1 |      |             |   | 152 | 37  | 94  | 51 |
| 3 |      |             |   | 154 | 53  | 104 | 40 |
| 0 |      |             |   | 164 | 106 | 117 | 26 |
| 1 |      |             |   | 158 | 126 | 101 | 32 |
| 1 | 51   | 0.541401274 | 1 | 222 | 110 | 143 | 57 |
| 1 |      |             |   | 157 | 59  | 96  | 50 |
| 1 | 54   | 0.52173913  | 1 | 171 | 82  | 97  | 58 |
| 2 |      |             |   | 180 | 365 | 73  | 34 |
| 1 | 51   | 0.542553191 | 1 | 161 | 33  | 111 | 43 |
| 1 |      |             |   | 153 | 55  | 100 | 42 |
| 1 | 57.5 | 0.508849558 | 1 | 122 | 62  | 82  | 27 |
| 1 |      |             |   | 128 | 70  | 83  | 31 |
| 1 |      |             |   | 179 | 90  | 117 | 44 |
| 1 | 59   | 0.551401869 | 1 | 122 | 62  | 82  | 27 |
| 1 | 47   | 0.443396226 | 0 | 154 | 131 | 90  | 38 |
| 1 | 50   | 0.471698113 | 0 | 146 | 37  | 95  | 44 |
| 1 |      |             |   | 181 | 43  | 132 | 40 |
| 1 |      |             |   | 127 | 81  | 85  | 26 |
| 2 | 60   | 0.582524272 | 1 | 152 | 36  | 97  | 48 |
| 1 | 49   | 0.556818182 | 1 | 129 | 45  | 71  | 49 |
| 1 |      |             |   | 129 | 49  | 78  | 41 |
| 2 |      |             |   | 161 | 70  | 100 | 47 |
| 3 | 66.5 | 0.536290323 | 1 | 178 | 108 | 84  | 72 |
| 1 |      |             |   | 204 | 63  | 126 | 65 |
| 1 |      |             |   | 135 | 65  | 86  | 36 |
| 1 |      |             |   | 160 | 78  | 96  | 49 |
| 1 | 46   | 0.429906542 | 0 | 138 | 92  | 76  | 43 |
| 1 |      |             |   | 178 | 115 | 118 | 37 |
| 1 |      |             |   | 118 | 55  | 73  | 34 |
| 1 |      |             |   | 138 | 58  | 71  | 56 |
| 1 |      |             |   | 167 | 117 | 96  | 48 |
| 1 |      |             |   | 176 | 34  | 108 | 62 |
| 1 |      |             |   | 184 | 134 | 118 | 39 |
| 1 | 57   | 0.368693402 | 0 | 164 | 79  | 109 | 40 |
| 1 |      |             |   | 179 | 91  | 104 | 57 |
| 1 |      |             |   | 132 | 115 | 81  | 28 |
| 1 | 51   | 0.64556962  | 1 | 195 | 52  | 135 | 50 |
| 1 |      |             |   | 206 | 84  | 140 | 50 |
| 0 | 50   | 0.472143532 | 0 | 111 | 55  | 68  | 33 |

|   |      |             |   |     |     |     |    |
|---|------|-------------|---|-----|-----|-----|----|
| 1 | 56.2 | 0.534220532 | 1 | 176 | 63  | 108 | 56 |
| 1 |      |             |   | 189 | 41  | 103 | 78 |
| 1 | 59   | 0.50212766  | 1 | 145 | 31  | 88  | 51 |
| 2 |      |             |   | 142 | 66  | 89  | 39 |
| 1 |      |             |   | 165 | 71  | 103 | 48 |
| 2 |      |             |   | 173 | 98  | 101 | 53 |
| 2 |      |             |   | 174 | 80  | 100 | 58 |
| 1 |      |             |   | 169 | 47  | 97  | 63 |
| 1 |      |             |   | 131 | 69  | 79  | 38 |
| 2 |      |             |   | 185 | 69  | 125 | 46 |
| 1 |      |             |   | 166 | 71  | 94  | 58 |
| 1 |      |             |   | 164 | 120 | 101 | 40 |
| 2 |      |             |   | 146 | 68  | 91  | 41 |
| 1 |      |             |   | 177 | 156 | 107 | 39 |
| 1 |      |             |   | 166 | 42  | 104 | 53 |
| 1 |      |             |   | 141 | 43  | 101 | 32 |
| 1 | 52   | 0.581005587 | 1 | 123 | 58  | 63  | 49 |
| 1 | 54   | 0.438311688 | 0 | 143 | 73  | 85  | 43 |
| 1 |      |             |   | 176 | 58  | 107 | 57 |
| 1 | 46   | 0.431924883 | 0 | 191 | 70  | 124 | 53 |
| 1 |      |             |   | 177 | 72  | 130 | 33 |
| 0 |      |             |   | 158 | 87  | 98  | 43 |
| 3 |      |             |   | 161 | 53  | 113 | 37 |
| 1 |      |             |   | 163 | 55  | 98  | 54 |
| 1 | 56.5 | 0.538095238 | 1 | 180 | 44  | 110 | 62 |
| 1 | 53   | 0.481818182 | 0 | 177 | 93  | 95  | 63 |
| 1 |      |             |   | 165 | 54  | 107 | 48 |
| 1 |      |             |   | 157 | 81  | 92  | 49 |
| 2 |      |             |   | 153 | 79  | 92  | 46 |
| 1 |      |             |   | 167 | 46  | 107 | 51 |
| 2 |      |             |   | 144 | 74  | 83  | 46 |
| 0 |      |             |   | 161 | 76  | 92  | 54 |
| 0 |      |             |   | 160 | 120 | 103 | 33 |
| 1 | 52   | 0.462222222 | 0 | 161 | 59  | 90  | 60 |
| 1 | 51   | 0.466179159 | 0 | 135 | 104 | 76  | 38 |
| 0 | 55   | 0.555555556 | 1 | 202 | 140 | 113 | 61 |
| 1 | 60   | 0.508474576 | 1 | 195 | 127 | 132 | 38 |
| 1 |      |             |   | 185 | 136 | 124 | 34 |
| 1 |      |             |   | 116 | 43  | 71  | 36 |
| 1 |      |             |   | 141 | 94  | 78  | 44 |
| 2 | 62   | 0.492063492 | 0 | 217 | 87  | 163 | 36 |
| 1 | 57   | 0.401408451 | 0 | 116 | 27  | 63  | 47 |
| 1 |      |             |   | 201 | 119 | 115 | 62 |
| 0 |      |             |   | 142 | 91  | 74  | 50 |
| 1 |      |             |   | 128 | 66  | 75  | 40 |

|   |      |             |   |     |     |     |    |
|---|------|-------------|---|-----|-----|-----|----|
| 1 |      |             |   | 175 | 70  | 120 | 41 |
| 1 |      |             |   | 112 | 46  | 66  | 37 |
| 1 |      |             |   | 152 | 85  | 96  | 39 |
| 1 |      |             |   | 120 | 85  | 70  | 33 |
| 1 |      |             |   | 156 | 85  | 94  | 45 |
| 1 | 51   | 0.447368421 | 0 | 185 | 120 | 116 | 45 |
| 1 |      |             |   | 154 | 154 | 91  | 32 |
| 1 | 62   | 0.556053812 | 1 | 176 | 83  | 119 | 41 |
| 1 |      |             |   | 147 | 77  | 78  | 54 |
| 1 | 63.5 | 0.5         | 1 | 160 | 78  | 103 | 42 |
| 1 |      |             |   | 143 | 116 | 83  | 36 |
| 1 |      |             |   | 170 | 80  | 113 | 41 |
| 1 | 59.5 | 0.5         | 1 | 144 | 87  | 80  | 47 |
| 2 |      |             |   | 154 | 115 | 98  | 33 |
| 1 |      |             |   | 171 | 48  | 106 | 56 |
| 1 | 67   | 0.531746032 | 1 | 223 | 126 | 151 | 47 |
| 1 |      |             |   | 131 | 66  | 69  | 49 |
| 1 |      |             |   | 144 | 49  | 86  | 48 |
| 1 | 63   | 0.518518519 | 1 | 127 | 54  | 73  | 43 |
| 1 |      |             |   | 140 | 118 | 83  | 33 |
| 1 |      |             |   | 128 | 100 | 72  | 36 |
| 1 |      |             |   | 155 | 99  | 96  | 40 |
| 0 | 52   | 0.597701149 | 1 | 209 | 138 | 138 | 43 |
| 1 |      |             |   | 127 | 54  | 67  | 50 |
| 2 | 72   | 0.566929134 | 1 | 150 | 61  | 78  | 60 |
| 1 |      |             |   | 129 | 90  | 66  | 45 |
| 1 |      |             |   | 168 | 102 | 80  | 68 |
| 1 | 60.5 | 0.441605839 | 0 | 138 | 85  | 79  | 42 |
| 1 |      |             |   | 130 | 48  | 81  | 39 |
| 1 |      |             |   | 128 | 74  | 62  | 51 |
| 2 | 79   | 0.593984962 | 1 | 171 | 99  | 114 | 38 |
| 3 |      |             |   | 109 | 74  | 54  | 40 |
| 1 | 56   | 0.504504505 | 1 | 153 | 184 | 80  | 37 |
| 1 |      |             |   | 144 | 117 | 90  | 31 |
| 1 |      |             |   | 142 | 55  | 89  | 42 |
| 1 |      |             |   | 115 | 46  | 61  | 45 |
| 1 | 66.5 | 0.573275862 | 1 | 137 | 85  | 82  | 38 |
| 1 | 61   | 0.5         | 1 | 139 | 59  | 92  | 36 |
| 1 | 75.2 | 0.572298326 | 1 | 162 | 108 | 98  | 42 |
| 1 |      |             |   | 85  | 135 | 29  | 29 |
| 1 | 68   | 0.498168498 | 0 | 186 | 165 | 108 | 45 |
| 1 |      |             |   | 135 | 60  | 84  | 39 |
| 1 |      |             |   | 172 | 58  | 107 | 53 |
| 1 |      |             |   | 139 | 124 | 72  | 42 |
| 1 | 67   | 0.817073171 | 1 | 172 | 127 | 106 | 41 |



|   |      |             |   |     |     |     |    |
|---|------|-------------|---|-----|-----|-----|----|
| 3 | 84   | 0.633962264 | 1 | 171 | 131 | 82  | 63 |
| 1 |      |             |   | 167 | 93  | 69  | 80 |
| 1 |      |             |   | 167 | 93  | 69  | 80 |
| 1 | 54   | 0.437246964 | 0 | 194 | 168 | 116 | 44 |
| 2 |      |             |   | 163 | 91  | 101 | 44 |
| 1 |      |             |   | 164 | 54  | 109 | 44 |
| 1 |      |             |   | 117 | 59  | 70  | 35 |
| 1 | 61.5 | 0.804973822 | 1 | 96  | 79  | 55  | 26 |
| 3 |      |             |   | 173 | 156 | 116 | 26 |
| 2 |      |             |   | 161 | 93  | 98  | 45 |
| 1 |      |             |   | 168 | 182 | 99  | 33 |
| 1 | 64   | 0.492307692 | 0 | 173 | 60  | 129 | 31 |
| 1 | 65   | 0.481481481 | 0 | 173 | 78  | 113 | 45 |
| 0 | 57   | 0.438461538 | 0 | 150 | 74  | 87  | 48 |
| 1 | 67   | 0.489051095 | 0 | 172 | 104 | 106 | 45 |
| 2 |      |             |   | 200 | 148 | 123 | 47 |
| 1 | 74   | 0.560606061 | 1 | 149 | 132 | 84  | 39 |
| 2 | 71   | 0.546153846 | 1 | 157 | 160 | 91  | 34 |
| 3 | 71   | 0.546153846 | 1 | 168 | 72  | 111 | 43 |
| 2 | 68.5 | 0.479356193 | 0 | 174 | 98  | 121 | 33 |
| 1 | 63.5 | 0.494163424 | 0 | 114 | 49  | 62  | 42 |
| 1 |      |             |   | 154 | 92  | 100 | 36 |
| 1 |      |             |   | 181 | 59  | 115 | 54 |
| 1 |      |             |   | 144 | 87  | 92  | 35 |
| 1 | 67   | 0.515384615 | 1 | 190 | 158 | 110 | 48 |
| 1 |      |             |   | 153 | 67  | 98  | 42 |
| 1 | 57   | 0.431818182 | 0 | 156 | 47  | 95  | 51 |
| 1 |      |             |   | 150 | 52  | 100 | 40 |
| 1 | 66   | 0.458333333 | 0 | 159 | 73  | 108 | 37 |
| 1 | 58.5 | 0.397959184 | 0 | 137 | 64  | 84  | 40 |
| 1 |      |             |   | 126 | 84  | 78  | 31 |
| 1 |      |             |   | 88  | 126 | 37  | 26 |
| 1 |      |             |   | 161 | 100 | 94  | 46 |
| 1 |      |             |   | 159 | 148 | 93  | 37 |
| 1 |      |             |   | 176 | 56  | 117 | 48 |
| 2 | 80.5 | 0.609848485 | 1 | 163 | 262 | 78  | 33 |
| 1 | 61   | 0.638743455 | 1 | 182 | 153 | 120 | 31 |
| 1 |      |             |   | 152 | 75  | 94  | 43 |
| 1 | 68   | 0.53125     | 1 | 181 | 183 | 103 | 41 |
| 1 | 71.5 | 0.55        | 1 | 181 | 118 | 113 | 45 |
| 1 |      |             |   | 160 | 59  | 103 | 45 |
| 1 |      |             |   | 134 | 87  | 73  | 44 |
| 1 |      |             |   | 163 | 84  | 104 | 42 |
| 1 |      |             |   | 138 | 98  | 96  | 23 |
| 1 |      |             |   | 168 | 210 | 90  | 36 |

|   |      |             |   |     |     |     |    |
|---|------|-------------|---|-----|-----|-----|----|
| 1 | 86   | 0.603508772 | 1 | 216 | 314 | 123 | 30 |
| 2 |      |             |   | 139 | 250 | 52  | 38 |
| 1 |      |             |   | 126 | 67  | 84  | 29 |
| 1 |      |             |   | 161 | 93  | 98  | 44 |
| 1 |      |             |   | 117 | 57  | 73  | 32 |
| 1 | 68   | 0.474198047 | 0 | 136 | 52  | 76  | 49 |
| 1 | 79   | 0.516339869 | 1 | 131 | 185 | 59  | 35 |
| 1 | 88   | 0.628571429 | 1 | 116 | 46  | 60  | 47 |
| 1 |      |             |   | 147 | 100 | 79  | 48 |
| 1 | 85   | 0.590277778 | 1 | 142 | 100 | 78  | 44 |
| 1 | 70   | 0.714285714 | 1 | 174 | 210 | 90  | 42 |
| 1 | 78   | 0.546218487 | 1 | 158 | 90  | 104 | 36 |
| 1 |      |             |   | 133 | 91  | 72  | 43 |
| 1 | 71   | 0.525925926 | 1 | 173 | 117 | 107 | 43 |
| 1 | 71   | 0.696078431 | 1 | 173 | 117 | 107 | 43 |
| 1 | 70   | 0.538461538 | 1 | 225 | 298 | 132 | 33 |
| 1 | 61   | 0.64893617  | 1 | 127 | 62  | 86  | 29 |
| 1 | 76   | 0.513513514 | 1 | 196 | 177 | 118 | 43 |
| 3 | 103  | 0.656050955 | 1 | 144 | 150 | 87  | 27 |
| 2 | 78   | 0.577777778 | 1 | 93  | 70  | 48  | 32 |
| 1 |      |             |   | 182 | 83  | 117 | 49 |
| 1 | 85   | 0.62962963  | 1 | 193 | 105 | 130 | 42 |
| 2 | 81.5 | 0.586330935 | 1 | 163 | 74  | 98  | 50 |
| 1 | 78   | 1.018276762 | 1 | 145 | 109 | 92  | 32 |
| 1 |      |             |   | 128 | 63  | 75  | 40 |
| 1 | 84   | 0.626865672 | 1 | 146 | 92  | 87  | 41 |
| 1 |      |             |   | 118 | 126 | 64  | 29 |
| 1 | 95   | 0.597484277 | 1 | 176 | 383 | 75  | 24 |
| 0 |      |             |   | 172 | 116 | 89  | 60 |
| 2 |      |             |   | 122 | 114 | 67  | 32 |
| 1 |      |             |   | 160 | 103 | 99  | 41 |
| 1 | 81   | 0.618320611 | 1 | 151 | 36  | 101 | 43 |
| 1 |      |             |   | 141 | 67  | 97  | 31 |
| 1 |      |             |   | 135 | 152 | 67  | 38 |
| 1 |      |             |   | 134 | 93  | 69  | 46 |
| 1 |      |             |   | 182 | 107 | 119 | 42 |
| 1 |      |             |   | 241 | 271 | 156 | 31 |
| 2 | 89   | 0.566878981 | 1 | 146 | 71  | 98  | 33 |
| 1 | 75   | 0.669642857 | 1 | 151 | 94  | 100 | 32 |
| 1 |      |             |   | 190 | 103 | 123 | 47 |
| 1 |      |             |   | 144 | 94  | 105 | 20 |
| 2 | 97.5 | 0.636007828 | 1 | 199 | 285 | 111 | 32 |
| 1 |      |             |   | 164 | 121 | 92  | 48 |
| 1 |      |             |   | 130 | 122 | 73  | 33 |
| 3 | 76   | 0.487179487 | 0 | 168 | 159 | 92  | 43 |

|   |      |             |   |     |     |     |    |
|---|------|-------------|---|-----|-----|-----|----|
| 1 | 91   | 0.758965805 | 1 | 166 | 144 | 98  | 39 |
| 2 | 90.5 | 0.786956522 | 1 | 143 | 157 | 72  | 40 |
| 0 |      |             |   | 120 | 97  | 63  | 38 |
| 1 |      |             |   | 164 | 130 | 102 | 36 |
| 1 |      |             |   | 150 | 282 | 63  | 31 |
| 1 | 78   | 0.548137737 | 1 | 156 | 74  | 91  | 51 |
| 1 |      |             |   | 132 | 105 | 75  | 36 |
| 1 | 73   | 0.536764706 | 1 | 166 | 121 | 105 | 37 |
| 1 |      |             |   | 190 | 128 | 128 | 36 |
| 1 | 67   | 0.451786918 | 0 | 164 | 121 | 92  | 48 |
| 1 |      |             |   | 147 | 122 | 83  | 40 |
| 1 |      |             |   | 148 | 156 | 84  | 33 |
| 1 |      |             |   | 211 | 130 | 127 | 58 |
| 1 |      |             |   | 204 | 176 | 121 | 47 |
| 1 |      |             |   | 100 | 44  | 49  | 43 |
| 1 |      |             |   | 152 | 58  | 94  | 47 |
| 1 |      |             |   | 169 | 64  | 116 | 40 |
| 1 |      |             |   | 136 | 76  | 70  | 51 |
| 1 | 75.5 | 0.535460993 | 1 | 121 | 146 | 66  | 26 |
| 2 |      |             |   | 170 | 72  | 99  | 56 |
| 1 |      |             |   | 174 | 80  | 114 | 44 |
| 1 |      |             |   | 177 | 84  | 115 | 45 |
| 1 |      |             |   | 180 | 84  | 120 | 44 |
| 3 |      |             |   | 224 | 111 | 143 | 59 |
| 1 |      |             |   | 136 | 60  | 86  | 38 |
| 1 |      |             |   | 164 | 67  | 108 | 42 |
| 1 | 75   | 0.646551724 | 1 | 162 | 105 | 99  | 42 |
| 2 |      |             |   | 144 | 120 | 89  | 32 |

| non-hdl<br>chol | high chol | chol<br>classific | high LDL | LDL classific | high TG | TG classific | low HDL |
|-----------------|-----------|-------------------|----------|---------------|---------|--------------|---------|
| 66.4            | 0         | 0                 | 0        | 0             | 0       | 0            | 1       |
| 129.5           | 0         | 1                 | 0        | 0             | 0       | 1            | 0       |
| 104.8           | 0         | 0                 | 0        | 0             | 0       | 0            | 1       |
| 134             | 0         | 1                 | 0        | 1             | 0       | 0            | 0       |
| 130.1           | 0         | 1                 | 0        | 0             | 1       | 2            | 0       |
| 98.4            | 0         | 0                 | 0        | 0             | 0       | 0            | 1       |
| 117.7           | 0         | 0                 | 0        | 0             | 0       | 1            | 1       |
| 116.4           | 0         | 0                 | 0        | 0             | 0       | 1            | 1       |
| 162.6           | 1         | 2                 | 1        | 2             | 0       | 0            | 1       |
| 102.6           | 0         | 0                 | 0        | 0             | 0       | 1            | 0       |
| 156.8           | 0         | 1                 | 1        | 2             | 1       | 2            | 1       |
| 70.2            | 0         | 0                 | 0        | 0             | 0       | 0            | 1       |
| 106             | 0         | 0                 | 0        | 0             | 0       | 0            | 0       |
| 128.9           | 0         | 0                 | 0        | 0             | 1       | 2            | 0       |
| 104.5           | 0         | 0                 | 0        | 0             | 1       | 2            | 1       |
| 120.2           | 0         | 1                 | 0        | 1             | 0       | 0            | 0       |
| 139.5           | 0         | 1                 | 0        | 1             | 0       | 0            | 0       |
| 141.4           | 0         | 1                 | 0        | 1             | 0       | 1            | 0       |
| 132.4           | 0         | 1                 | 0        | 1             | 0       | 1            | 0       |
| 89.3            | 0         | 0                 | 0        | 0             | 0       | 0            | 1       |
| 77.1            | 0         | 0                 | 0        | 0             | 0       | 1            | 1       |
| 111.5           | 0         | 0                 | 0        | 0             | 1       | 2            | 1       |
| 156             | 1         | 2                 | 1        | 2             | 0       | 0            | 0       |
| 167.5           | 1         | 2                 | 1        | 2             | 1       | 2            | 0       |
| 91              | 0         | 0                 | 0        | 0             | 0       | 0            | 0       |
| 70.2            | 0         | 0                 | 0        | 0             | 0       | 0            | 1       |
| 101.2           | 0         | 0                 | 0        | 0             | 0       | 1            | 1       |
| 76.3            | 0         | 0                 | 0        | 0             | 0       | 1            | 1       |
| 111.9           | 0         | 0                 | 0        | 0             | 0       | 1            | 1       |
| 89              | 0         | 0                 | 0        | 0             | 1       | 2            | 1       |
| 122             | 0         | 1                 | 0        | 0             | 0       | 1            | 0       |
| 152.2           | 0         | 1                 | 0        | 1             | 1       | 2            | 1       |
| 99.1            | 0         | 0                 | 0        | 0             | 0       | 0            | 1       |
| 82.4            | 0         | 0                 | 0        | 0             | 1       | 2            | 1       |
| 83.5            | 0         | 0                 | 0        | 0             | 1       | 2            | 1       |
| 155.4           | 0         | 1                 | 0        | 1             | 1       | 2            | 1       |
| 122.4           | 0         | 0                 | 0        | 1             | 0       | 0            | 0       |
| 140.7           | 0         | 1                 | 0        | 1             | 1       | 2            | 0       |
| 111.7           | 0         | 0                 | 0        | 0             | 0       | 1            | 1       |
| 112.8           | 0         | 0                 | 0        | 0             | 0       | 1            | 1       |
| 77.2            | 0         | 0                 | 0        | 0             | 0       | 1            | 1       |
| 156             | 0         | 1                 | 1        | 2             | 0       | 1            | 1       |
| 72.8            | 0         | 0                 | 0        | 0             | 0       | 0            | 0       |

|       |   |   |   |   |   |   |   |
|-------|---|---|---|---|---|---|---|
| 126.6 | 0 | 0 | 0 | 1 | 0 | 0 | 1 |
| 108   | 0 | 0 | 0 | 0 | 0 | 0 | 1 |
| 95.9  | 0 | 0 | 0 | 0 | 0 | 0 | 0 |
| 132.3 | 0 | 0 | 0 | 0 | 1 | 2 | 1 |
| 125.8 | 0 | 1 | 0 | 1 | 0 | 0 | 0 |
| 92.2  | 0 | 0 | 0 | 0 | 0 | 1 | 0 |
| 109.2 | 0 | 0 | 0 | 0 | 0 | 0 | 1 |
| 140.6 | 0 | 1 | 0 | 1 | 0 | 1 | 1 |
| 160.5 | 0 | 1 | 1 | 2 | 1 | 2 | 1 |
| 162.3 | 1 | 2 | 1 | 2 | 0 | 1 | 0 |
| 136.6 | 0 | 1 | 0 | 1 | 1 | 2 | 0 |
| 134   | 0 | 1 | 0 | 1 | 0 | 0 | 1 |
| 132.1 | 0 | 0 | 0 | 1 | 0 | 0 | 1 |
| 132.1 | 0 | 0 | 0 | 1 | 0 | 0 | 1 |
| 129   | 0 | 0 | 0 | 1 | 0 | 1 | 1 |
| 96    | 0 | 0 | 0 | 0 | 1 | 2 | 1 |
| 132.3 | 0 | 1 | 0 | 1 | 0 | 1 | 1 |
| 90.4  | 0 | 0 | 0 | 0 | 0 | 0 | 0 |
| 113.2 | 0 | 0 | 0 | 0 | 0 | 0 | 1 |
| 111.8 | 0 | 0 | 0 | 0 | 0 | 0 | 1 |
| 212.4 | 1 | 2 | 1 | 2 | 1 | 2 | 1 |
| 114.7 | 0 | 0 | 0 | 0 | 0 | 0 | 1 |
| 107.3 | 0 | 0 | 0 | 0 | 1 | 2 | 1 |
| 116.5 | 0 | 0 | 0 | 0 | 0 | 0 | 0 |
| 163.2 | 1 | 2 | 1 | 2 | 0 | 0 | 1 |
| 82.4  | 0 | 0 | 0 | 0 | 0 | 0 | 1 |
| 117.8 | 0 | 0 | 0 | 0 | 1 | 2 | 0 |
| 67.3  | 0 | 0 | 0 | 0 | 1 | 2 | 0 |
| 156.1 | 0 | 1 | 1 | 2 | 0 | 1 | 0 |
| 157.7 | 0 | 1 | 0 | 1 | 1 | 2 | 1 |
| 130.1 | 0 | 1 | 0 | 0 | 1 | 2 | 0 |
| 96    | 0 | 0 | 0 | 0 | 0 | 1 | 1 |
| 123   | 0 | 1 | 0 | 1 | 0 | 0 | 0 |
| 94.4  | 0 | 0 | 0 | 0 | 0 | 0 | 0 |
| 93    | 0 | 0 | 0 | 0 | 0 | 0 | 1 |
| 146.4 | 0 | 1 | 0 | 1 | 1 | 2 | 1 |
| 81.2  | 0 | 0 | 0 | 0 | 0 | 0 | 1 |
| 144.2 | 0 | 1 | 1 | 2 | 0 | 0 | 0 |
| 159.9 | 1 | 2 | 1 | 2 | 1 | 2 | 0 |
| 88.8  | 0 | 0 | 0 | 0 | 0 | 0 | 1 |
| 145.5 | 0 | 1 | 0 | 1 | 1 | 2 | 1 |
| 84.9  | 0 | 0 | 0 | 0 | 0 | 1 | 1 |
| 124.8 | 0 | 1 | 0 | 1 | 0 | 0 | 0 |
| 115.5 | 0 | 0 | 0 | 0 | 0 | 1 | 0 |
| 110.4 | 0 | 0 | 0 | 0 | 0 | 1 | 1 |

|       |   |   |   |   |   |   |   |
|-------|---|---|---|---|---|---|---|
| 114.1 | 0 | 0 | 0 | 0 | 1 | 2 | 1 |
| 146.1 | 0 | 1 | 1 | 2 | 0 | 0 | 1 |
| 137.2 | 0 | 1 | 0 | 1 | 1 | 2 | 0 |
| 84.4  | 0 | 0 | 0 | 0 | 0 | 0 | 0 |
| 152.3 | 0 | 1 | 1 | 2 | 0 | 1 | 1 |
| 171.4 | 1 | 2 | 1 | 2 | 0 | 1 | 0 |
| 85.7  | 0 | 0 | 0 | 0 | 0 | 0 | 1 |
| 131.7 | 0 | 1 | 0 | 1 | 0 | 0 | 0 |
| 108.4 | 0 | 0 | 0 | 0 | 1 | 2 | 1 |
| 117.9 | 0 | 0 | 0 | 0 | 0 | 1 | 0 |
| 101.7 | 0 | 0 | 0 | 0 | 0 | 1 | 1 |
| 129.9 | 0 | 0 | 0 | 1 | 0 | 0 | 1 |
| 159.7 | 0 | 1 | 0 | 1 | 1 | 2 | 1 |
| 67.8  | 0 | 0 | 0 | 0 | 0 | 0 | 0 |
| 150.3 | 0 | 1 | 1 | 2 | 0 | 1 | 0 |
| 122.4 | 0 | 0 | 0 | 1 | 0 | 0 | 0 |
| 103.4 | 0 | 0 | 0 | 0 | 0 | 0 | 0 |
| 115.3 | 0 | 0 | 0 | 0 | 1 | 2 | 1 |
| 136.6 | 0 | 1 | 0 | 1 | 0 | 0 | 0 |
| 104.7 | 0 | 0 | 0 | 0 | 0 | 1 | 0 |
| 92.6  | 0 | 0 | 0 | 0 | 0 | 1 | 1 |
| 155.4 | 0 | 1 | 1 | 2 | 1 | 2 | 1 |
| 93.1  | 0 | 0 | 0 | 0 | 1 | 2 | 1 |
| 118.8 | 0 | 1 | 0 | 0 | 0 | 0 | 0 |
| 144.2 | 0 | 1 | 0 | 1 | 1 | 2 | 1 |
| 167.3 | 1 | 2 | 1 | 2 | 1 | 2 | 1 |
| 109.9 | 0 | 0 | 0 | 0 | 0 | 0 | 0 |
| 124.1 | 0 | 0 | 0 | 1 | 0 | 0 | 1 |
| 70.7  | 0 | 0 | 0 | 0 | 0 | 0 | 1 |
| 91.5  | 0 | 0 | 0 | 0 | 0 | 1 | 0 |
| 134.4 | 0 | 0 | 0 | 1 | 0 | 1 | 1 |
| 105.1 | 0 | 0 | 0 | 0 | 0 | 0 | 0 |
| 105.6 | 0 | 0 | 0 | 0 | 0 | 0 | 1 |
| 99.6  | 0 | 0 | 0 | 0 | 0 | 0 | 0 |
| 115   | 0 | 0 | 0 | 0 | 0 | 0 | 0 |
| 129.9 | 0 | 1 | 0 | 1 | 0 | 1 | 0 |
| 67.5  | 0 | 0 | 0 | 0 | 0 | 0 | 0 |
| 109.4 | 0 | 0 | 0 | 0 | 1 | 2 | 1 |
| 101.1 | 0 | 0 | 0 | 0 | 0 | 1 | 0 |
| 109.2 | 0 | 0 | 0 | 0 | 0 | 0 | 0 |
| 145.2 | 0 | 1 | 0 | 1 | 1 | 2 | 1 |
| 97.8  | 0 | 0 | 0 | 0 | 0 | 0 | 1 |
| 115.4 | 0 | 0 | 0 | 0 | 0 | 1 | 1 |
| 139.9 | 1 | 2 | 0 | 1 | 0 | 0 | 0 |
| 101.8 | 0 | 0 | 0 | 0 | 0 | 1 | 0 |

|       |   |   |   |   |   |   |   |
|-------|---|---|---|---|---|---|---|
| 134.2 | 0 | 1 | 0 | 1 | 0 | 1 | 0 |
| 123.5 | 0 | 0 | 0 | 0 | 0 | 1 | 0 |
| 121.8 | 0 | 0 | 0 | 0 | 0 | 1 | 0 |
| 139.6 | 0 | 1 | 0 | 1 | 0 | 0 | 0 |
| 83.7  | 0 | 0 | 0 | 0 | 0 | 0 | 1 |
| 78.4  | 0 | 0 | 0 | 0 | 0 | 0 | 0 |
| 101.2 | 0 | 0 | 0 | 0 | 0 | 0 | 0 |
| 114.5 | 0 | 0 | 0 | 0 | 0 | 0 | 1 |
| 138.2 | 0 | 0 | 0 | 1 | 1 | 2 | 1 |
| 126.5 | 0 | 0 | 0 | 0 | 1 | 2 | 1 |
| 165.3 | 1 | 2 | 1 | 2 | 1 | 2 | 0 |
| 107.4 | 0 | 0 | 0 | 0 | 0 | 0 | 0 |
| 112.9 | 0 | 1 | 0 | 0 | 0 | 1 | 0 |
| 146.2 | 0 | 1 | 0 | 0 | 1 | 2 | 1 |
| 117.6 | 0 | 0 | 0 | 1 | 0 | 0 | 0 |
| 110.9 | 0 | 0 | 0 | 0 | 0 | 0 | 0 |
| 94.7  | 0 | 0 | 0 | 0 | 0 | 0 | 1 |
| 97.1  | 0 | 0 | 0 | 0 | 0 | 0 | 1 |
| 134.7 | 0 | 1 | 0 | 1 | 0 | 1 | 0 |
| 94.7  | 0 | 0 | 0 | 0 | 0 | 0 | 1 |
| 116.2 | 0 | 0 | 0 | 0 | 1 | 2 | 1 |
| 102.3 | 0 | 0 | 0 | 0 | 0 | 0 | 0 |
| 140.6 | 0 | 1 | 1 | 2 | 0 | 0 | 0 |
| 101.3 | 0 | 0 | 0 | 0 | 0 | 1 | 1 |
| 104   | 0 | 0 | 0 | 0 | 0 | 0 | 0 |
| 80.2  | 0 | 0 | 0 | 0 | 0 | 0 | 0 |
| 87.9  | 0 | 0 | 0 | 0 | 0 | 0 | 0 |
| 114.3 | 0 | 0 | 0 | 0 | 0 | 0 | 0 |
| 105.7 | 0 | 1 | 0 | 0 | 1 | 2 | 0 |
| 138.6 | 1 | 2 | 0 | 1 | 0 | 0 | 0 |
| 99.3  | 0 | 0 | 0 | 0 | 0 | 0 | 1 |
| 111.1 | 0 | 0 | 0 | 0 | 0 | 1 | 0 |
| 94.7  | 0 | 0 | 0 | 0 | 0 | 1 | 0 |
| 141   | 0 | 1 | 0 | 1 | 1 | 2 | 1 |
| 84    | 0 | 0 | 0 | 0 | 0 | 0 | 1 |
| 82.2  | 0 | 0 | 0 | 0 | 0 | 0 | 0 |
| 119.4 | 0 | 0 | 0 | 0 | 1 | 2 | 0 |
| 114.4 | 0 | 1 | 0 | 0 | 0 | 0 | 0 |
| 144.6 | 0 | 1 | 0 | 1 | 1 | 2 | 1 |
| 124.5 | 0 | 0 | 0 | 0 | 0 | 1 | 1 |
| 122.5 | 0 | 1 | 0 | 0 | 0 | 1 | 0 |
| 104.2 | 0 | 0 | 0 | 0 | 1 | 2 | 1 |
| 144.9 | 0 | 1 | 1 | 2 | 0 | 0 | 0 |
| 156.4 | 1 | 2 | 1 | 2 | 0 | 1 | 0 |
| 78.5  | 0 | 0 | 0 | 0 | 0 | 0 | 1 |

|       |   |   |   |   |   |   |   |
|-------|---|---|---|---|---|---|---|
| 120.5 | 0 | 1 | 0 | 0 | 0 | 0 | 0 |
| 110.7 | 0 | 1 | 0 | 0 | 0 | 0 | 0 |
| 94    | 0 | 0 | 0 | 0 | 0 | 0 | 0 |
| 102.6 | 0 | 0 | 0 | 0 | 0 | 0 | 1 |
| 117.2 | 0 | 0 | 0 | 0 | 0 | 0 | 0 |
| 120.3 | 0 | 1 | 0 | 0 | 0 | 1 | 0 |
| 116.1 | 0 | 1 | 0 | 0 | 0 | 1 | 0 |
| 106.4 | 0 | 0 | 0 | 0 | 0 | 0 | 0 |
| 92.7  | 0 | 0 | 0 | 0 | 0 | 0 | 1 |
| 139.1 | 0 | 1 | 0 | 1 | 0 | 0 | 0 |
| 108.5 | 0 | 0 | 0 | 0 | 0 | 0 | 0 |
| 124.5 | 0 | 0 | 0 | 0 | 1 | 2 | 1 |
| 105   | 0 | 0 | 0 | 0 | 0 | 0 | 0 |
| 138.1 | 0 | 1 | 0 | 0 | 1 | 2 | 1 |
| 112.8 | 0 | 0 | 0 | 0 | 0 | 0 | 0 |
| 109.5 | 0 | 0 | 0 | 0 | 0 | 0 | 1 |
| 74.3  | 0 | 0 | 0 | 0 | 0 | 0 | 0 |
| 99.6  | 0 | 0 | 0 | 0 | 0 | 0 | 0 |
| 118.9 | 0 | 1 | 0 | 0 | 0 | 0 | 0 |
| 138.3 | 0 | 1 | 0 | 1 | 0 | 0 | 0 |
| 144.3 | 0 | 1 | 0 | 1 | 0 | 0 | 1 |
| 115   | 0 | 0 | 0 | 0 | 0 | 1 | 0 |
| 123.7 | 0 | 0 | 0 | 1 | 0 | 0 | 1 |
| 109.2 | 0 | 0 | 0 | 0 | 0 | 0 | 0 |
| 118.3 | 0 | 1 | 0 | 0 | 0 | 0 | 0 |
| 113.9 | 0 | 1 | 0 | 0 | 0 | 1 | 0 |
| 117.4 | 0 | 0 | 0 | 0 | 0 | 0 | 0 |
| 107.8 | 0 | 0 | 0 | 0 | 0 | 1 | 0 |
| 107.5 | 0 | 0 | 0 | 0 | 0 | 1 | 0 |
| 115.9 | 0 | 0 | 0 | 0 | 0 | 0 | 0 |
| 97.6  | 0 | 0 | 0 | 0 | 0 | 0 | 0 |
| 107.2 | 0 | 0 | 0 | 0 | 0 | 1 | 0 |
| 126.9 | 0 | 0 | 0 | 0 | 1 | 2 | 1 |
| 101.5 | 0 | 0 | 0 | 0 | 0 | 0 | 0 |
| 96.6  | 0 | 0 | 0 | 0 | 1 | 2 | 1 |
| 140.7 | 1 | 2 | 0 | 1 | 1 | 2 | 0 |
| 157   | 0 | 1 | 1 | 2 | 1 | 2 | 1 |
| 151.5 | 0 | 1 | 0 | 1 | 1 | 2 | 1 |
| 79.7  | 0 | 0 | 0 | 0 | 0 | 0 | 1 |
| 97.1  | 0 | 0 | 0 | 0 | 0 | 1 | 0 |
| 180.8 | 1 | 2 | 1 | 2 | 0 | 1 | 1 |
| 68.6  | 0 | 0 | 0 | 0 | 0 | 0 | 0 |
| 139   | 1 | 2 | 0 | 1 | 1 | 2 | 0 |
| 91.9  | 0 | 0 | 0 | 0 | 0 | 1 | 0 |
| 88    | 0 | 0 | 0 | 0 | 0 | 0 | 0 |



|       |   |   |   |   |   |   |   |
|-------|---|---|---|---|---|---|---|
| 133.9 | 0 | 1 | 0 | 1 | 0 | 0 | 0 |
| 75.5  | 0 | 0 | 0 | 0 | 0 | 0 | 1 |
| 112.9 | 0 | 0 | 0 | 0 | 0 | 1 | 1 |
| 86.8  | 0 | 0 | 0 | 0 | 0 | 1 | 1 |
| 111.3 | 0 | 0 | 0 | 0 | 0 | 1 | 0 |
| 140.3 | 0 | 1 | 0 | 1 | 1 | 2 | 0 |
| 122.1 | 0 | 0 | 0 | 0 | 1 | 2 | 1 |
| 135.5 | 0 | 1 | 0 | 1 | 0 | 1 | 0 |
| 93.1  | 0 | 0 | 0 | 0 | 0 | 1 | 0 |
| 118.2 | 0 | 0 | 0 | 0 | 0 | 1 | 0 |
| 106.6 | 0 | 0 | 0 | 0 | 1 | 2 | 1 |
| 128.7 | 0 | 1 | 0 | 1 | 0 | 1 | 0 |
| 97.5  | 0 | 0 | 0 | 0 | 0 | 1 | 0 |
| 120.9 | 0 | 0 | 0 | 0 | 1 | 2 | 1 |
| 115.3 | 0 | 1 | 0 | 0 | 0 | 0 | 0 |
| 176.2 | 1 | 2 | 1 | 2 | 1 | 2 | 0 |
| 82.2  | 0 | 0 | 0 | 0 | 0 | 0 | 0 |
| 96.1  | 0 | 0 | 0 | 0 | 0 | 0 | 0 |
| 84.2  | 0 | 0 | 0 | 0 | 0 | 0 | 0 |
| 106.9 | 0 | 0 | 0 | 0 | 1 | 2 | 1 |
| 92.1  | 0 | 0 | 0 | 0 | 1 | 2 | 1 |
| 115.5 | 0 | 0 | 0 | 0 | 0 | 1 | 1 |
| 166   | 1 | 2 | 1 | 2 | 1 | 2 | 0 |
| 77.5  | 0 | 0 | 0 | 0 | 0 | 0 | 0 |
| 89.8  | 0 | 0 | 0 | 0 | 0 | 0 | 0 |
| 83.9  | 0 | 0 | 0 | 0 | 0 | 1 | 0 |
| 100.5 | 0 | 0 | 0 | 0 | 1 | 2 | 0 |
| 96.1  | 0 | 0 | 0 | 0 | 0 | 1 | 0 |
| 91    | 0 | 0 | 0 | 0 | 0 | 0 | 1 |
| 76.8  | 0 | 0 | 0 | 0 | 0 | 0 | 0 |
| 133.3 | 0 | 1 | 0 | 1 | 0 | 1 | 1 |
| 69.2  | 0 | 0 | 0 | 0 | 0 | 0 | 1 |
| 116.3 | 0 | 0 | 0 | 0 | 1 | 2 | 1 |
| 113.1 | 0 | 0 | 0 | 0 | 0 | 1 | 1 |
| 100.2 | 0 | 0 | 0 | 0 | 0 | 0 | 0 |
| 70    | 0 | 0 | 0 | 0 | 0 | 0 | 0 |
| 99.4  | 0 | 0 | 0 | 0 | 0 | 0 | 1 |
| 103.4 | 0 | 0 | 0 | 0 | 0 | 0 | 1 |
| 119.9 | 0 | 0 | 0 | 0 | 0 | 1 | 0 |
| 55.8  | 0 | 0 | 0 | 0 | 1 | 2 | 1 |
| 141.2 | 0 | 1 | 0 | 0 | 1 | 2 | 0 |
| 96.4  | 0 | 0 | 0 | 0 | 0 | 0 | 1 |
| 118.7 | 0 | 1 | 0 | 0 | 0 | 0 | 0 |
| 97.2  | 0 | 0 | 0 | 0 | 0 | 1 | 0 |
| 131   | 0 | 1 | 0 | 0 | 1 | 2 | 0 |

|       |   |   |   |   |   |   |   |
|-------|---|---|---|---|---|---|---|
| 107.7 | 0 | 1 | 0 | 0 | 1 | 2 | 0 |
| 87.2  | 0 | 0 | 0 | 0 | 0 | 1 | 0 |
| 87.2  | 0 | 0 | 0 | 0 | 0 | 1 | 0 |
| 150   | 0 | 1 | 0 | 1 | 1 | 2 | 0 |
| 118.7 | 0 | 0 | 0 | 0 | 0 | 1 | 0 |
| 120.2 | 0 | 0 | 0 | 0 | 0 | 0 | 0 |
| 82.1  | 0 | 0 | 0 | 0 | 0 | 0 | 1 |
| 70.3  | 0 | 0 | 0 | 0 | 0 | 0 | 1 |
| 146.7 | 0 | 1 | 0 | 1 | 1 | 2 | 1 |
| 116.3 | 0 | 0 | 0 | 0 | 0 | 1 | 0 |
| 135   | 0 | 0 | 0 | 0 | 1 | 2 | 1 |
| 141.8 | 0 | 1 | 0 | 1 | 0 | 0 | 1 |
| 128.3 | 0 | 1 | 0 | 1 | 0 | 0 | 0 |
| 102.2 | 0 | 0 | 0 | 0 | 0 | 0 | 0 |
| 127   | 0 | 1 | 0 | 0 | 0 | 1 | 0 |
| 152.7 | 1 | 2 | 0 | 1 | 1 | 2 | 0 |
| 110   | 0 | 0 | 0 | 0 | 1 | 2 | 1 |
| 123.4 | 0 | 0 | 0 | 0 | 1 | 2 | 1 |
| 125   | 0 | 0 | 0 | 1 | 0 | 0 | 0 |
| 140.7 | 0 | 1 | 0 | 1 | 0 | 1 | 1 |
| 72.1  | 0 | 0 | 0 | 0 | 0 | 0 | 0 |
| 117.9 | 0 | 0 | 0 | 0 | 0 | 1 | 1 |
| 127.2 | 0 | 1 | 0 | 1 | 0 | 0 | 0 |
| 109.4 | 0 | 0 | 0 | 0 | 0 | 0 | 1 |
| 142   | 0 | 1 | 0 | 1 | 1 | 2 | 0 |
| 111.3 | 0 | 0 | 0 | 0 | 0 | 0 | 0 |
| 104.8 | 0 | 0 | 0 | 0 | 0 | 0 | 0 |
| 110   | 0 | 0 | 0 | 0 | 0 | 0 | 0 |
| 122.4 | 0 | 0 | 0 | 0 | 0 | 0 | 1 |
| 96.8  | 0 | 0 | 0 | 0 | 0 | 0 | 0 |
| 95.2  | 0 | 0 | 0 | 0 | 0 | 0 | 1 |
| 61.7  | 0 | 0 | 0 | 0 | 0 | 1 | 1 |
| 115   | 0 | 0 | 0 | 0 | 0 | 1 | 0 |
| 122.5 | 0 | 0 | 0 | 0 | 1 | 2 | 1 |
| 127.9 | 0 | 1 | 0 | 1 | 0 | 0 | 0 |
| 130   | 0 | 0 | 0 | 0 | 1 | 2 | 1 |
| 150.8 | 0 | 1 | 0 | 1 | 1 | 2 | 1 |
| 109.2 | 0 | 0 | 0 | 0 | 0 | 0 | 0 |
| 139.7 | 0 | 1 | 0 | 0 | 1 | 2 | 0 |
| 136.4 | 0 | 1 | 0 | 1 | 0 | 1 | 0 |
| 114.6 | 0 | 0 | 0 | 0 | 0 | 0 | 0 |
| 89.9  | 0 | 0 | 0 | 0 | 0 | 0 | 0 |
| 121   | 0 | 0 | 0 | 0 | 0 | 0 | 0 |
| 115.5 | 0 | 0 | 0 | 0 | 0 | 1 | 1 |
| 132   | 0 | 0 | 0 | 0 | 1 | 2 | 1 |

|       |   |   |   |   |   |   |   |
|-------|---|---|---|---|---|---|---|
| 186.1 | 1 | 2 | 0 | 1 | 1 | 2 | 1 |
| 101.5 | 0 | 0 | 0 | 0 | 1 | 2 | 1 |
| 97.3  | 0 | 0 | 0 | 0 | 0 | 0 | 1 |
| 117   | 0 | 0 | 0 | 0 | 0 | 1 | 0 |
| 84.6  | 0 | 0 | 0 | 0 | 0 | 0 | 1 |
| 86.6  | 0 | 0 | 0 | 0 | 0 | 0 | 0 |
| 96.2  | 0 | 0 | 0 | 0 | 1 | 2 | 1 |
| 68.9  | 0 | 0 | 0 | 0 | 0 | 0 | 0 |
| 99.3  | 0 | 0 | 0 | 0 | 0 | 1 | 0 |
| 97.7  | 0 | 0 | 0 | 0 | 0 | 1 | 0 |
| 132.3 | 0 | 1 | 0 | 0 | 1 | 2 | 0 |
| 121.8 | 0 | 0 | 0 | 0 | 0 | 1 | 1 |
| 90.2  | 0 | 0 | 0 | 0 | 0 | 1 | 0 |
| 130.2 | 0 | 1 | 0 | 0 | 0 | 1 | 0 |
| 130.2 | 0 | 1 | 0 | 0 | 0 | 1 | 0 |
| 191.7 | 1 | 2 | 1 | 2 | 1 | 2 | 1 |
| 98.2  | 0 | 0 | 0 | 0 | 0 | 0 | 1 |
| 153.3 | 0 | 1 | 0 | 1 | 1 | 2 | 0 |
| 116.9 | 0 | 0 | 0 | 0 | 1 | 2 | 1 |
| 61.5  | 0 | 0 | 0 | 0 | 0 | 0 | 1 |
| 133.4 | 0 | 1 | 0 | 1 | 0 | 0 | 0 |
| 151.1 | 0 | 1 | 1 | 2 | 0 | 1 | 0 |
| 113   | 0 | 0 | 0 | 0 | 0 | 0 | 0 |
| 113.4 | 0 | 0 | 0 | 0 | 0 | 1 | 1 |
| 88    | 0 | 0 | 0 | 0 | 0 | 0 | 0 |
| 105.2 | 0 | 0 | 0 | 0 | 0 | 1 | 0 |
| 89    | 0 | 0 | 0 | 0 | 0 | 1 | 1 |
| 151.8 | 0 | 1 | 0 | 0 | 1 | 2 | 1 |
| 111.9 | 0 | 1 | 0 | 0 | 0 | 1 | 0 |
| 89.8  | 0 | 0 | 0 | 0 | 1 | 2 | 1 |
| 119.5 | 0 | 0 | 0 | 0 | 0 | 1 | 0 |
| 108   | 0 | 0 | 0 | 0 | 0 | 0 | 0 |
| 110.4 | 0 | 0 | 0 | 0 | 0 | 0 | 1 |
| 97.3  | 0 | 0 | 0 | 0 | 1 | 2 | 1 |
| 87.6  | 0 | 0 | 0 | 0 | 0 | 1 | 0 |
| 140   | 0 | 1 | 0 | 1 | 0 | 1 | 0 |
| 209.8 | 1 | 2 | 1 | 2 | 1 | 2 | 1 |
| 112.6 | 0 | 0 | 0 | 0 | 0 | 0 | 1 |
| 119.1 | 0 | 0 | 0 | 0 | 0 | 1 | 1 |
| 143.4 | 0 | 1 | 0 | 1 | 0 | 1 | 0 |
| 124.1 | 0 | 0 | 0 | 0 | 0 | 1 | 1 |
| 167.5 | 0 | 1 | 0 | 1 | 1 | 2 | 1 |
| 115.9 | 0 | 0 | 0 | 0 | 0 | 1 | 0 |
| 97.3  | 0 | 0 | 0 | 0 | 0 | 1 | 1 |
| 125   | 0 | 0 | 0 | 0 | 1 | 2 | 0 |

|       |   |   |   |   |   |   |   |
|-------|---|---|---|---|---|---|---|
| 126.9 | 0 | 0 | 0 | 0 | 1 | 2 | 1 |
| 102.9 | 0 | 0 | 0 | 0 | 1 | 2 | 0 |
| 82    | 0 | 0 | 0 | 0 | 0 | 1 | 1 |
| 127.7 | 0 | 0 | 0 | 0 | 1 | 2 | 1 |
| 119.2 | 0 | 0 | 0 | 0 | 1 | 2 | 1 |
| 105.4 | 0 | 0 | 0 | 0 | 0 | 0 | 0 |
| 96.2  | 0 | 0 | 0 | 0 | 0 | 1 | 1 |
| 128.7 | 0 | 0 | 0 | 0 | 0 | 1 | 1 |
| 154   | 0 | 1 | 0 | 1 | 0 | 1 | 1 |
| 115.9 | 0 | 0 | 0 | 0 | 0 | 1 | 0 |
| 107.1 | 0 | 0 | 0 | 0 | 0 | 1 | 1 |
| 115.5 | 0 | 0 | 0 | 0 | 1 | 2 | 1 |
| 153.2 | 1 | 2 | 0 | 1 | 1 | 2 | 0 |
| 156.6 | 1 | 2 | 0 | 1 | 1 | 2 | 0 |
| 57.4  | 0 | 0 | 0 | 0 | 0 | 0 | 0 |
| 105.4 | 0 | 0 | 0 | 0 | 0 | 0 | 0 |
| 129.2 | 0 | 0 | 0 | 1 | 0 | 0 | 1 |
| 85.2  | 0 | 0 | 0 | 0 | 0 | 0 | 0 |
| 94.8  | 0 | 0 | 0 | 0 | 1 | 2 | 1 |
| 113.7 | 0 | 1 | 0 | 0 | 0 | 0 | 0 |
| 129.6 | 0 | 1 | 0 | 1 | 0 | 0 | 0 |
| 131.7 | 0 | 1 | 0 | 1 | 0 | 0 | 0 |
| 136.3 | 0 | 1 | 0 | 1 | 0 | 0 | 0 |
| 164.8 | 1 | 2 | 1 | 2 | 0 | 1 | 0 |
| 97.6  | 0 | 0 | 0 | 0 | 0 | 0 | 1 |
| 121.6 | 0 | 0 | 0 | 0 | 0 | 0 | 0 |
| 120.2 | 0 | 0 | 0 | 0 | 0 | 1 | 0 |
| 112.5 | 0 | 0 | 0 | 0 | 0 | 1 | 1 |

| HDL classific | high non-HDL | non-HDL classific | dyslipidemia classification | high chol and low HDL | multiple dyslip | dysl |
|---------------|--------------|-------------------|-----------------------------|-----------------------|-----------------|------|
| 2             | 0            | 0                 | 0                           | 3                     | 0               | 0    |
| 0             | 0            | 0                 | 1                           | 0                     | 0               | 0    |
| 2             | 0            | 0                 | 0                           | 3                     | 0               | 0    |
| 0             | 0            | 0                 | 1                           | 0                     | 0               | 0    |
| 0             | 0            | 0                 | 1                           | 2                     | 0               | 0    |
| 2             | 0            | 0                 | 0                           | 3                     | 0               | 0    |
| 2             | 0            | 0                 | 0                           | 3                     | 0               | 0    |
| 2             | 1            | 2                 | 2                           | 4                     | 1               | 0    |
| 0             | 0            | 0                 | 0                           | 0                     | 0               | 0    |
| 2             | 1            | 2                 | 2                           | 4                     | 0               | 1    |
| 2             | 0            | 0                 | 0                           | 3                     | 0               | 0    |
| 0             | 0            | 0                 | 0                           | 0                     | 0               | 0    |
| 1             | 0            | 1                 | 1                           | 2                     | 0               | 0    |
| 2             | 0            | 0                 | 0                           | 4                     | 0               | 0    |
| 0             | 0            | 1                 | 1                           | 0                     | 0               | 0    |
| 1             | 0            | 1                 | 1                           | 0                     | 0               | 0    |
| 0             | 0            | 1                 | 1                           | 0                     | 0               | 0    |
| 2             | 0            | 0                 | 0                           | 3                     | 0               | 0    |
| 2             | 0            | 0                 | 0                           | 3                     | 0               | 0    |
| 2             | 0            | 0                 | 0                           | 4                     | 0               | 0    |
| 0             | 1            | 2                 | 2                           | 1                     | 0               | 0    |
| 1             | 1            | 2                 | 2                           | 4                     | 0               | 0    |
| 0             | 0            | 0                 | 0                           | 0                     | 0               | 0    |
| 2             | 0            | 0                 | 0                           | 3                     | 0               | 0    |
| 2             | 0            | 0                 | 0                           | 3                     | 0               | 0    |
| 2             | 0            | 0                 | 0                           | 3                     | 0               | 0    |
| 2             | 0            | 0                 | 0                           | 4                     | 0               | 0    |
| 0             | 0            | 1                 | 1                           | 0                     | 0               | 0    |
| 2             | 1            | 2                 | 2                           | 4                     | 0               | 0    |
| 2             | 0            | 0                 | 0                           | 3                     | 0               | 0    |
| 2             | 0            | 0                 | 0                           | 4                     | 0               | 0    |
| 2             | 0            | 0                 | 0                           | 3                     | 0               | 0    |
| 2             | 0            | 0                 | 0                           | 4                     | 0               | 0    |
| 2             | 0            | 0                 | 0                           | 4                     | 0               | 0    |
| 2             | 1            | 2                 | 2                           | 4                     | 0               | 0    |
| 1             | 0            | 1                 | 1                           | 0                     | 0               | 0    |
| 1             | 0            | 1                 | 1                           | 2                     | 0               | 0    |
| 2             | 0            | 0                 | 0                           | 3                     | 0               | 0    |
| 2             | 0            | 0                 | 0                           | 3                     | 0               | 0    |
| 2             | 0            | 0                 | 0                           | 3                     | 0               | 0    |
| 2             | 0            | 0                 | 0                           | 3                     | 0               | 0    |
| 2             | 1            | 2                 | 2                           | 4                     | 1               | 0    |
| 0             | 0            | 0                 | 0                           | 0                     | 0               | 0    |

|   |   |   |   |   |   |
|---|---|---|---|---|---|
| 2 | 0 | 1 | 3 | 0 | 0 |
| 2 | 0 | 0 | 3 | 0 | 0 |
| 1 | 0 | 0 | 0 | 0 | 0 |
| 2 | 0 | 1 | 4 | 0 | 0 |
| 0 | 0 | 1 | 0 | 0 | 0 |
| 1 | 0 | 0 | 0 | 0 | 0 |
| 2 | 0 | 0 | 3 | 0 | 0 |
| 2 | 0 | 1 | 3 | 0 | 0 |
| 2 | 1 | 2 | 4 | 0 | 1 |
| 0 | 1 | 2 | 1 | 0 | 0 |
| 0 | 0 | 1 | 2 | 0 | 0 |
| 2 | 0 | 1 | 3 | 0 | 0 |
| 2 | 0 | 1 | 3 | 0 | 0 |
| 2 | 0 | 1 | 3 | 0 | 0 |
| 2 | 0 | 1 | 3 | 0 | 0 |
| 2 | 0 | 0 | 4 | 0 | 0 |
| 2 | 0 | 1 | 3 | 0 | 0 |
| 0 | 0 | 0 | 0 | 0 | 0 |
| 2 | 0 | 0 | 3 | 0 | 0 |
| 2 | 0 | 0 | 3 | 0 | 0 |
| 2 | 1 | 2 | 4 | 0 | 1 |
| 2 | 0 | 0 | 3 | 0 | 0 |
| 2 | 0 | 0 | 4 | 0 | 0 |
| 1 | 0 | 0 | 0 | 0 | 0 |
| 2 | 1 | 2 | 4 | 1 | 0 |
| 2 | 0 | 0 | 3 | 0 | 0 |
| 1 | 0 | 0 | 2 | 0 | 0 |
| 0 | 0 | 0 | 2 | 0 | 0 |
| 1 | 1 | 2 | 1 | 0 | 0 |
| 2 | 1 | 2 | 4 | 0 | 0 |
| 1 | 0 | 1 | 2 | 0 | 0 |
| 2 | 0 | 0 | 3 | 0 | 0 |
| 0 | 0 | 1 | 0 | 0 | 0 |
| 0 | 0 | 0 | 0 | 0 | 0 |
| 2 | 0 | 0 | 3 | 0 | 0 |
| 2 | 1 | 2 | 4 | 0 | 0 |
| 2 | 0 | 0 | 3 | 0 | 0 |
| 0 | 0 | 1 | 1 | 0 | 0 |
| 0 | 1 | 2 | 4 | 0 | 0 |
| 2 | 0 | 0 | 3 | 0 | 0 |
| 2 | 1 | 2 | 4 | 0 | 0 |
| 2 | 0 | 0 | 3 | 0 | 0 |
| 0 | 0 | 1 | 0 | 0 | 0 |
| 0 | 0 | 0 | 0 | 0 | 0 |
| 2 | 0 | 0 | 3 | 0 | 0 |

|   |   |   |   |   |   |
|---|---|---|---|---|---|
| 2 | 0 | 0 | 4 | 0 | 0 |
| 2 | 1 | 2 | 4 | 1 | 0 |
| 1 | 0 | 1 | 2 | 0 | 0 |
| 0 | 0 | 0 | 0 | 0 | 0 |
| 2 | 1 | 2 | 4 | 1 | 0 |
| 1 | 1 | 2 | 1 | 0 | 0 |
| 2 | 0 | 0 | 3 | 0 | 0 |
| 0 | 0 | 1 | 0 | 0 | 0 |
| 2 | 0 | 0 | 4 | 0 | 0 |
| 0 | 0 | 0 | 0 | 0 | 0 |
| 2 | 0 | 0 | 3 | 0 | 0 |
| 2 | 0 | 1 | 3 | 0 | 0 |
| 2 | 1 | 2 | 4 | 0 | 0 |
| 0 | 0 | 0 | 0 | 0 | 0 |
| 1 | 1 | 2 | 1 | 0 | 0 |
| 1 | 0 | 1 | 0 | 0 | 0 |
| 0 | 0 | 0 | 0 | 0 | 0 |
| 2 | 0 | 0 | 4 | 0 | 0 |
| 0 | 0 | 1 | 0 | 0 | 0 |
| 0 | 0 | 0 | 0 | 0 | 0 |
| 2 | 0 | 0 | 3 | 0 | 0 |
| 2 | 1 | 2 | 4 | 0 | 1 |
| 2 | 0 | 0 | 4 | 0 | 0 |
| 0 | 0 | 0 | 0 | 0 | 0 |
| 2 | 0 | 1 | 4 | 0 | 0 |
| 2 | 1 | 2 | 4 | 0 | 1 |
| 1 | 0 | 0 | 0 | 0 | 0 |
| 2 | 0 | 1 | 3 | 0 | 0 |
| 2 | 0 | 0 | 3 | 0 | 0 |
| 1 | 0 | 0 | 0 | 0 | 0 |
| 2 | 0 | 1 | 3 | 0 | 0 |
| 1 | 0 | 0 | 0 | 0 | 0 |
| 2 | 0 | 0 | 3 | 0 | 0 |
| 0 | 0 | 0 | 0 | 0 | 0 |
| 1 | 0 | 0 | 0 | 0 | 0 |
| 0 | 0 | 1 | 0 | 0 | 0 |
| 0 | 0 | 0 | 0 | 0 | 0 |
| 2 | 0 | 0 | 4 | 0 | 0 |
| 0 | 0 | 0 | 0 | 0 | 0 |
| 0 | 0 | 0 | 0 | 0 | 0 |
| 2 | 1 | 2 | 4 | 0 | 0 |
| 2 | 0 | 0 | 3 | 0 | 0 |
| 2 | 0 | 0 | 3 | 0 | 0 |
| 0 | 0 | 1 | 1 | 0 | 0 |
| 1 | 0 | 0 | 0 | 0 | 0 |

|   |   |   |   |   |   |
|---|---|---|---|---|---|
| 0 | 0 | 1 | 0 | 0 | 0 |
| 1 | 0 | 1 | 0 | 0 | 0 |
| 0 | 0 | 1 | 0 | 0 | 0 |
| 0 | 0 | 1 | 0 | 0 | 0 |
| 2 | 0 | 0 | 3 | 0 | 0 |
| 0 | 0 | 0 | 0 | 0 | 0 |
| 0 | 0 | 0 | 0 | 0 | 0 |
| 2 | 0 | 0 | 3 | 0 | 0 |
| 2 | 0 | 1 | 4 | 0 | 0 |
| 2 | 0 | 1 | 4 | 0 | 0 |
| 0 | 1 | 2 | 4 | 0 | 0 |
| 0 | 0 | 0 | 0 | 0 | 0 |
| 0 | 0 | 0 | 0 | 0 | 0 |
| 2 | 1 | 2 | 4 | 0 | 0 |
| 1 | 0 | 0 | 0 | 0 | 0 |
| 1 | 0 | 0 | 0 | 0 | 0 |
| 2 | 0 | 0 | 3 | 0 | 0 |
| 2 | 0 | 0 | 3 | 0 | 0 |
| 1 | 0 | 1 | 0 | 0 | 0 |
| 2 | 0 | 0 | 3 | 0 | 0 |
| 2 | 0 | 0 | 4 | 0 | 0 |
| 1 | 0 | 0 | 0 | 0 | 0 |
| 1 | 0 | 1 | 1 | 0 | 0 |
| 2 | 0 | 0 | 3 | 0 | 0 |
| 0 | 0 | 0 | 0 | 0 | 0 |
| 0 | 0 | 0 | 0 | 0 | 0 |
| 1 | 0 | 0 | 0 | 0 | 0 |
| 0 | 0 | 0 | 0 | 0 | 0 |
| 0 | 0 | 0 | 2 | 0 | 0 |
| 0 | 0 | 1 | 1 | 0 | 0 |
| 2 | 0 | 0 | 3 | 0 | 0 |
| 0 | 0 | 0 | 0 | 0 | 0 |
| 1 | 0 | 0 | 0 | 0 | 0 |
| 2 | 0 | 1 | 4 | 0 | 0 |
| 2 | 0 | 0 | 3 | 0 | 0 |
| 0 | 0 | 0 | 0 | 0 | 0 |
| 0 | 0 | 0 | 2 | 0 | 0 |
| 0 | 0 | 0 | 0 | 0 | 0 |
| 2 | 0 | 1 | 4 | 0 | 0 |
| 2 | 0 | 1 | 3 | 0 | 0 |
| 0 | 0 | 1 | 0 | 0 | 0 |
| 2 | 0 | 0 | 4 | 0 | 0 |
| 0 | 0 | 1 | 1 | 0 | 0 |
| 0 | 1 | 2 | 1 | 0 | 0 |
| 2 | 0 | 0 | 3 | 0 | 0 |





|   |   |   |   |   |   |
|---|---|---|---|---|---|
| 1 | 0 | 1 | 0 | 0 | 0 |
| 2 | 0 | 0 | 3 | 0 | 0 |
| 2 | 0 | 0 | 3 | 0 | 0 |
| 2 | 0 | 0 | 3 | 0 | 0 |
| 1 | 0 | 0 | 0 | 0 | 0 |
| 1 | 0 | 1 | 2 | 0 | 0 |
| 2 | 0 | 1 | 4 | 0 | 0 |
| 1 | 0 | 1 | 0 | 0 | 0 |
| 0 | 0 | 0 | 0 | 0 | 0 |
| 1 | 0 | 0 | 0 | 0 | 0 |
| 2 | 0 | 0 | 4 | 0 | 0 |
| 1 | 0 | 1 | 0 | 0 | 0 |
| 0 | 0 | 0 | 0 | 0 | 0 |
| 2 | 0 | 1 | 4 | 0 | 0 |
| 0 | 0 | 0 | 0 | 0 | 0 |
| 0 | 1 | 2 | 4 | 0 | 0 |
| 0 | 0 | 0 | 0 | 0 | 0 |
| 0 | 0 | 0 | 0 | 0 | 0 |
| 1 | 0 | 0 | 0 | 0 | 0 |
| 2 | 0 | 0 | 4 | 0 | 0 |
| 2 | 0 | 0 | 4 | 0 | 0 |
| 2 | 0 | 0 | 3 | 0 | 0 |
| 1 | 1 | 2 | 4 | 0 | 0 |
| 0 | 0 | 0 | 0 | 0 | 0 |
| 0 | 0 | 0 | 0 | 0 | 0 |
| 0 | 0 | 0 | 0 | 0 | 0 |
| 0 | 0 | 0 | 2 | 0 | 0 |
| 1 | 0 | 0 | 0 | 0 | 0 |
| 2 | 0 | 0 | 3 | 0 | 0 |
| 0 | 0 | 0 | 0 | 0 | 0 |
| 2 | 0 | 1 | 3 | 0 | 0 |
| 2 | 0 | 0 | 3 | 0 | 0 |
| 2 | 0 | 0 | 4 | 0 | 0 |
| 2 | 0 | 0 | 3 | 0 | 0 |
| 1 | 0 | 0 | 0 | 0 | 0 |
| 1 | 0 | 0 | 0 | 0 | 0 |
| 2 | 0 | 0 | 3 | 0 | 0 |
| 2 | 0 | 0 | 3 | 0 | 0 |
| 1 | 0 | 0 | 0 | 0 | 0 |
| 2 | 0 | 0 | 4 | 0 | 0 |
| 1 | 0 | 1 | 2 | 0 | 0 |
| 2 | 0 | 0 | 3 | 0 | 0 |
| 0 | 0 | 0 | 0 | 0 | 0 |
| 1 | 0 | 0 | 0 | 0 | 0 |
| 1 | 0 | 1 | 2 | 0 | 0 |

|   |   |   |   |   |   |
|---|---|---|---|---|---|
| 0 | 0 | 0 | 2 | 0 | 0 |
| 0 | 0 | 0 | 0 | 0 | 0 |
| 0 | 0 | 0 | 0 | 0 | 0 |
| 1 | 1 | 2 | 2 | 0 | 0 |
| 1 | 0 | 0 | 0 | 0 | 0 |
| 1 | 0 | 1 | 0 | 0 | 0 |
| 2 | 0 | 0 | 3 | 0 | 0 |
| 2 | 0 | 0 | 3 | 0 | 0 |
| 2 | 1 | 2 | 4 | 0 | 0 |
| 1 | 0 | 0 | 0 | 0 | 0 |
| 2 | 0 | 1 | 4 | 0 | 0 |
| 2 | 0 | 1 | 3 | 0 | 0 |
| 1 | 0 | 1 | 0 | 0 | 0 |
| 0 | 0 | 0 | 0 | 0 | 0 |
| 1 | 0 | 1 | 0 | 0 | 0 |
| 0 | 1 | 2 | 4 | 0 | 0 |
| 2 | 0 | 0 | 4 | 0 | 0 |
| 2 | 0 | 1 | 4 | 0 | 0 |
| 1 | 0 | 1 | 0 | 0 | 0 |
| 2 | 0 | 1 | 3 | 0 | 0 |
| 1 | 0 | 0 | 0 | 0 | 0 |
| 2 | 0 | 0 | 3 | 0 | 0 |
| 0 | 0 | 1 | 0 | 0 | 0 |
| 2 | 0 | 0 | 3 | 0 | 0 |
| 0 | 0 | 1 | 2 | 0 | 0 |
| 1 | 0 | 0 | 0 | 0 | 0 |
| 0 | 0 | 0 | 0 | 0 | 0 |
| 1 | 0 | 0 | 0 | 0 | 0 |
| 2 | 0 | 1 | 3 | 0 | 0 |
| 1 | 0 | 0 | 0 | 0 | 0 |
| 2 | 0 | 0 | 3 | 0 | 0 |
| 2 | 0 | 0 | 3 | 0 | 0 |
| 0 | 0 | 0 | 0 | 0 | 0 |
| 2 | 0 | 1 | 4 | 0 | 0 |
| 0 | 0 | 1 | 0 | 0 | 0 |
| 2 | 0 | 1 | 4 | 0 | 0 |
| 2 | 1 | 2 | 4 | 0 | 0 |
| 1 | 0 | 0 | 0 | 0 | 0 |
| 1 | 0 | 1 | 2 | 0 | 0 |
| 1 | 0 | 1 | 0 | 0 | 0 |
| 0 | 0 | 0 | 0 | 0 | 0 |
| 1 | 0 | 0 | 0 | 0 | 0 |
| 1 | 0 | 1 | 0 | 0 | 0 |
| 2 | 0 | 0 | 3 | 0 | 0 |
| 2 | 0 | 1 | 4 | 0 | 0 |

|   |   |   |   |   |   |
|---|---|---|---|---|---|
| 2 | 1 | 2 | 4 | 0 | 1 |
| 2 | 0 | 0 | 4 | 0 | 0 |
| 2 | 0 | 0 | 3 | 0 | 0 |
| 1 | 0 | 0 | 0 | 0 | 0 |
| 2 | 0 | 0 | 3 | 0 | 0 |
| 0 | 0 | 0 | 0 | 0 | 0 |
| 2 | 0 | 0 | 4 | 0 | 0 |
| 0 | 0 | 0 | 0 | 0 | 0 |
| 0 | 0 | 0 | 0 | 0 | 0 |
| 1 | 0 | 0 | 0 | 0 | 0 |
| 1 | 0 | 1 | 2 | 0 | 0 |
| 2 | 0 | 1 | 3 | 0 | 0 |
| 1 | 0 | 0 | 0 | 0 | 0 |
| 1 | 0 | 1 | 0 | 0 | 0 |
| 1 | 0 | 1 | 0 | 0 | 0 |
| 2 | 1 | 2 | 4 | 0 | 1 |
| 2 | 0 | 0 | 3 | 0 | 0 |
| 1 | 1 | 2 | 2 | 0 | 0 |
| 2 | 0 | 0 | 4 | 0 | 0 |
| 2 | 0 | 0 | 3 | 0 | 0 |
| 0 | 0 | 1 | 0 | 0 | 0 |
| 1 | 1 | 2 | 1 | 0 | 0 |
| 0 | 0 | 0 | 0 | 0 | 0 |
| 2 | 0 | 0 | 3 | 0 | 0 |
| 1 | 0 | 0 | 0 | 0 | 0 |
| 1 | 0 | 0 | 0 | 0 | 0 |
| 2 | 0 | 0 | 3 | 0 | 0 |
| 2 | 1 | 2 | 4 | 0 | 0 |
| 0 | 0 | 0 | 0 | 0 | 0 |
| 2 | 0 | 0 | 4 | 0 | 0 |
| 1 | 0 | 0 | 0 | 0 | 0 |
| 1 | 0 | 0 | 0 | 0 | 0 |
| 2 | 0 | 0 | 3 | 0 | 0 |
| 2 | 0 | 0 | 4 | 0 | 0 |
| 0 | 0 | 0 | 0 | 0 | 0 |
| 1 | 0 | 1 | 0 | 0 | 0 |
| 2 | 1 | 2 | 4 | 0 | 1 |
| 2 | 0 | 0 | 3 | 0 | 0 |
| 2 | 0 | 0 | 3 | 0 | 0 |
| 0 | 0 | 1 | 0 | 0 | 0 |
| 2 | 0 | 1 | 3 | 0 | 0 |
| 2 | 1 | 2 | 4 | 0 | 0 |
| 0 | 0 | 0 | 0 | 0 | 0 |
| 2 | 0 | 0 | 3 | 0 | 0 |
| 1 | 0 | 1 | 2 | 0 | 0 |

|   |   |   |   |   |   |
|---|---|---|---|---|---|
| 2 | 0 | 1 | 4 | 0 | 0 |
| 1 | 0 | 0 | 2 | 0 | 0 |
| 2 | 0 | 0 | 3 | 0 | 0 |
| 2 | 0 | 1 | 4 | 0 | 0 |
| 2 | 0 | 0 | 4 | 0 | 0 |
| 0 | 0 | 0 | 0 | 0 | 0 |
| 2 | 0 | 0 | 3 | 0 | 0 |
| 2 | 0 | 1 | 3 | 0 | 0 |
| 2 | 1 | 2 | 3 | 0 | 0 |
| 0 | 0 | 0 | 0 | 0 | 0 |
| 2 | 0 | 0 | 3 | 0 | 0 |
| 2 | 0 | 0 | 4 | 0 | 0 |
| 0 | 1 | 2 | 4 | 0 | 0 |
| 0 | 1 | 2 | 4 | 0 | 0 |
| 1 | 0 | 0 | 0 | 0 | 0 |
| 0 | 0 | 0 | 0 | 0 | 0 |
| 2 | 0 | 1 | 3 | 0 | 0 |
| 0 | 0 | 0 | 0 | 0 | 0 |
| 2 | 0 | 0 | 4 | 0 | 0 |
| 0 | 0 | 0 | 0 | 0 | 0 |
| 1 | 0 | 1 | 0 | 0 | 0 |
| 0 | 0 | 1 | 0 | 0 | 0 |
| 1 | 0 | 1 | 0 | 0 | 0 |
| 0 | 1 | 2 | 1 | 0 | 0 |
| 2 | 0 | 0 | 3 | 0 | 0 |
| 1 | 0 | 1 | 0 | 0 | 0 |
| 1 | 0 | 1 | 0 | 0 | 0 |
| 2 | 0 | 0 | 3 | 0 | 0 |

| dyslipidemia | simple classif | atherogenic<br>dyslipidemia | mixed<br>dyslipidemia | border or<br>highchol | border or high<br>triglyd |
|--------------|----------------|-----------------------------|-----------------------|-----------------------|---------------------------|
| 1            |                | 1                           | 0                     | 0                     | 0                         |
| 0            |                | 0                           | 0                     | 0                     | 1                         |
| 1            |                | 1                           | 0                     | 0                     | 0                         |
| 0            |                | 0                           | 0                     | 0                     | 1                         |
| 1            |                | 1                           | 0                     | 0                     | 1                         |
| 1            |                | 1                           | 0                     | 0                     | 0                         |
| 1            |                | 1                           | 0                     | 0                     | 0                         |
| 1            |                | 1                           | 0                     | 0                     | 0                         |
| 1            |                | 2                           | 0                     | 0                     | 1                         |
| 0            |                | 0                           | 0                     | 0                     | 0                         |
| 1            |                | 2                           | 1                     | 1                     | 1                         |
| 1            |                | 1                           | 0                     | 0                     | 0                         |
| 0            |                | 0                           | 0                     | 0                     | 0                         |
| 1            |                | 1                           | 0                     | 0                     | 0                         |
| 1            |                | 2                           | 1                     | 0                     | 0                         |
| 0            |                | 0                           | 0                     | 0                     | 1                         |
| 0            |                | 0                           | 0                     | 0                     | 1                         |
| 0            |                | 0                           | 0                     | 0                     | 1                         |
| 1            |                | 1                           | 0                     | 0                     | 0                         |
| 1            |                | 1                           | 0                     | 0                     | 0                         |
| 1            |                | 2                           | 1                     | 0                     | 0                         |
| 1            |                | 1                           | 0                     | 0                     | 1                         |
| 1            |                | 2                           | 0                     | 1                     | 1                         |
| 0            |                | 0                           | 0                     | 0                     | 0                         |
| 1            |                | 1                           | 0                     | 0                     | 0                         |
| 1            |                | 1                           | 0                     | 0                     | 0                         |
| 1            |                | 1                           | 0                     | 0                     | 0                         |
| 1            |                | 1                           | 0                     | 0                     | 0                         |
| 1            |                | 2                           | 1                     | 0                     | 0                         |
| 0            |                | 0                           | 0                     | 0                     | 1                         |
| 1            |                | 2                           | 1                     | 0                     | 1                         |
| 1            |                | 1                           | 0                     | 0                     | 0                         |
| 1            |                | 2                           | 1                     | 0                     | 0                         |
| 1            |                | 2                           | 1                     | 0                     | 0                         |
| 1            |                | 2                           | 1                     | 0                     | 1                         |
| 0            |                | 0                           | 0                     | 0                     | 0                         |
| 1            |                | 1                           | 0                     | 0                     | 1                         |
| 1            |                | 1                           | 0                     | 0                     | 0                         |
| 1            |                | 1                           | 0                     | 0                     | 0                         |
| 1            |                | 1                           | 0                     | 0                     | 0                         |
| 1            |                | 1                           | 0                     | 0                     | 0                         |
| 1            |                | 2                           | 0                     | 0                     | 1                         |
| 0            |                | 0                           | 0                     | 0                     | 0                         |



|   |   |   |   |   |
|---|---|---|---|---|
| 1 | 2 | 1 | 0 | 0 |
| 1 | 2 | 0 | 0 | 1 |
| 1 | 1 | 0 | 0 | 1 |
| 0 | 0 | 0 | 0 | 0 |
| 1 | 2 | 0 | 0 | 1 |
| 1 | 1 | 0 | 0 | 1 |
| 1 | 1 | 0 | 0 | 0 |
| 0 | 0 | 0 | 0 | 1 |
| 1 | 2 | 1 | 0 | 0 |
| 0 | 0 | 0 | 0 | 0 |
| 1 | 1 | 0 | 0 | 0 |
| 1 | 1 | 0 | 0 | 0 |
| 1 | 2 | 1 | 0 | 1 |
| 0 | 0 | 0 | 0 | 0 |
| 1 | 1 | 0 | 0 | 1 |
| 0 | 0 | 0 | 0 | 0 |
| 0 | 0 | 0 | 0 | 0 |
| 1 | 2 | 1 | 0 | 0 |
| 0 | 0 | 0 | 0 | 1 |
| 0 | 0 | 0 | 0 | 0 |
| 1 | 1 | 0 | 0 | 0 |
| 1 | 2 | 1 | 1 | 1 |
| 1 | 2 | 1 | 0 | 0 |
| 0 | 0 | 0 | 0 | 1 |
| 1 | 2 | 1 | 0 | 1 |
| 1 | 2 | 1 | 1 | 1 |
| 0 | 0 | 0 | 0 | 0 |
| 1 | 1 | 0 | 0 | 0 |
| 1 | 1 | 0 | 0 | 0 |
| 0 | 0 | 0 | 0 | 0 |
| 1 | 1 | 0 | 0 | 0 |
| 0 | 0 | 0 | 0 | 0 |
| 0 | 0 | 0 | 0 | 0 |
| 0 | 0 | 0 | 0 | 0 |
| 0 | 0 | 0 | 0 | 0 |
| 0 | 0 | 0 | 0 | 1 |
| 0 | 0 | 0 | 0 | 0 |
| 1 | 2 | 1 | 0 | 0 |
| 0 | 0 | 0 | 0 | 0 |
| 0 | 0 | 0 | 0 | 0 |
| 1 | 2 | 1 | 0 | 1 |
| 1 | 1 | 0 | 0 | 0 |
| 1 | 1 | 0 | 0 | 0 |
| 1 | 1 | 0 | 0 | 1 |
| 0 | 0 | 0 | 0 | 0 |



|   |   |   |   |   |
|---|---|---|---|---|
| 0 | 0 | 0 | 0 | 1 |
| 0 | 0 | 0 | 0 | 0 |
| 0 | 0 | 0 | 0 | 0 |
| 0 | 0 | 0 | 0 | 1 |
| 1 | 1 | 0 | 0 | 0 |
| 0 | 0 | 0 | 0 | 0 |
| 0 | 0 | 0 | 0 | 0 |
| 1 | 1 | 0 | 0 | 0 |
| 1 | 2 | 1 | 0 | 0 |
| 1 | 2 | 1 | 0 | 0 |
| 1 | 2 | 0 | 1 | 1 |
| 0 | 0 | 0 | 0 | 0 |
| 0 | 0 | 0 | 0 | 1 |
| 1 | 2 | 1 | 0 | 1 |
| 0 | 0 | 0 | 0 | 0 |
| 0 | 0 | 0 | 0 | 0 |
| 1 | 1 | 0 | 0 | 0 |
| 1 | 1 | 0 | 0 | 0 |
| 0 | 0 | 0 | 0 | 1 |
| 1 | 1 | 0 | 0 | 0 |
| 1 | 2 | 1 | 0 | 0 |
| 0 | 0 | 0 | 0 | 0 |
| 1 | 1 | 0 | 0 | 1 |
| 1 | 1 | 0 | 0 | 0 |
| 0 | 0 | 0 | 0 | 0 |
| 0 | 0 | 0 | 0 | 0 |
| 0 | 0 | 0 | 0 | 0 |
| 0 | 0 | 0 | 0 | 0 |
| 1 | 1 | 0 | 0 | 1 |
| 1 | 1 | 0 | 0 | 1 |
| 1 | 1 | 0 | 0 | 0 |
| 0 | 0 | 0 | 0 | 0 |
| 0 | 0 | 0 | 0 | 0 |
| 1 | 2 | 1 | 0 | 1 |
| 1 | 1 | 0 | 0 | 0 |
| 0 | 0 | 0 | 0 | 0 |
| 1 | 1 | 0 | 0 | 0 |
| 0 | 0 | 0 | 0 | 1 |
| 1 | 2 | 1 | 0 | 1 |
| 1 | 1 | 0 | 0 | 0 |
| 0 | 0 | 0 | 0 | 1 |
| 1 | 2 | 1 | 0 | 0 |
| 1 | 1 | 0 | 0 | 1 |
| 1 | 1 | 0 | 0 | 1 |



|   |   |   |   |   |
|---|---|---|---|---|
| 0 | 0 | 0 | 0 | 1 |
| 1 | 1 | 0 | 0 | 0 |
| 1 | 1 | 0 | 0 | 0 |
| 1 | 1 | 0 | 0 | 0 |
| 0 | 0 | 0 | 0 | 0 |
| 1 | 1 | 0 | 0 | 1 |
| 1 | 2 | 1 | 0 | 0 |
| 0 | 0 | 0 | 0 | 1 |
| 0 | 0 | 0 | 0 | 0 |
| 0 | 0 | 0 | 0 | 0 |
| 1 | 2 | 1 | 0 | 0 |
| 0 | 0 | 0 | 0 | 1 |
| 1 | 2 | 0 | 0 | 1 |
| 1 | 2 | 0 | 1 | 1 |
| 0 | 0 | 0 | 0 | 0 |
| 0 | 0 | 0 | 0 | 0 |
| 0 | 0 | 0 | 0 | 0 |
| 1 | 2 | 1 | 0 | 0 |
| 1 | 2 | 1 | 0 | 0 |
| 1 | 1 | 0 | 0 | 0 |
| 1 | 2 | 0 | 1 | 1 |
| 0 | 0 | 0 | 0 | 0 |
| 0 | 0 | 0 | 0 | 0 |
| 0 | 0 | 0 | 0 | 0 |
| 1 | 1 | 0 | 0 | 0 |
| 0 | 0 | 0 | 0 | 0 |
| 1 | 1 | 0 | 0 | 0 |
| 0 | 0 | 0 | 0 | 0 |
| 1 | 1 | 0 | 0 | 1 |
| 1 | 1 | 0 | 0 | 0 |
| 1 | 2 | 1 | 0 | 0 |
| 1 | 1 | 0 | 0 | 0 |
| 0 | 0 | 0 | 0 | 0 |
| 0 | 0 | 0 | 0 | 0 |
| 1 | 1 | 0 | 0 | 0 |
| 1 | 1 | 0 | 0 | 0 |
| 0 | 0 | 0 | 0 | 0 |
| 1 | 2 | 1 | 0 | 0 |
| 1 | 1 | 0 | 0 | 1 |
| 1 | 1 | 0 | 0 | 0 |
| 0 | 0 | 0 | 0 | 1 |
| 0 | 0 | 0 | 0 | 0 |
| 1 | 1 | 0 | 0 | 1 |

|   |   |   |   |   |
|---|---|---|---|---|
| 1 | 1 | 0 | 0 | 1 |
| 0 | 0 | 0 | 0 | 0 |
| 0 | 0 | 0 | 0 | 0 |
| 1 | 1 | 0 | 0 | 1 |
| 0 | 0 | 0 | 0 | 0 |
| 0 | 0 | 0 | 0 | 0 |
| 1 | 1 | 0 | 0 | 0 |
| 1 | 1 | 0 | 0 | 0 |
| 1 | 2 | 1 | 0 | 1 |
| 0 | 0 | 0 | 0 | 0 |
| 1 | 2 | 1 | 0 | 0 |
| 1 | 1 | 0 | 0 | 1 |
| 0 | 0 | 0 | 0 | 1 |
| 0 | 0 | 0 | 0 | 0 |
| 1 | 2 | 0 | 1 | 1 |
| 1 | 2 | 1 | 0 | 0 |
| 1 | 2 | 1 | 0 | 0 |
| 0 | 0 | 0 | 0 | 0 |
| 1 | 1 | 0 | 0 | 1 |
| 0 | 0 | 0 | 0 | 0 |
| 1 | 1 | 0 | 0 | 0 |
| 1 | 1 | 0 | 0 | 1 |
| 0 | 0 | 0 | 0 | 0 |
| 0 | 0 | 0 | 0 | 0 |
| 1 | 1 | 0 | 0 | 0 |
| 0 | 0 | 0 | 0 | 0 |
| 1 | 1 | 0 | 0 | 0 |
| 1 | 1 | 0 | 0 | 0 |
| 0 | 0 | 0 | 0 | 0 |
| 0 | 0 | 0 | 0 | 0 |
| 1 | 1 | 0 | 0 | 0 |
| 0 | 0 | 0 | 0 | 0 |
| 0 | 0 | 0 | 0 | 0 |
| 0 | 0 | 0 | 0 | 0 |
| 1 | 1 | 0 | 0 | 0 |
| 0 | 0 | 0 | 0 | 1 |
| 0 | 0 | 0 | 0 | 0 |
| 0 | 0 | 0 | 0 | 0 |
| 1 | 1 | 0 | 0 | 0 |
| 1 | 2 | 1 | 0 | 0 |

|   |   |   |   |   |
|---|---|---|---|---|
| 1 | 2 | 1 | 1 | 1 |
| 1 | 2 | 1 | 0 | 0 |
| 1 | 1 | 0 | 0 | 0 |
| 0 | 0 | 0 | 0 | 0 |
| 1 | 1 | 0 | 0 | 0 |
| 0 | 0 | 0 | 0 | 0 |
| 1 | 2 | 1 | 0 | 0 |
| 0 | 0 | 0 | 0 | 0 |
| 0 | 0 | 0 | 0 | 0 |
| 0 | 0 | 0 | 0 | 0 |
| 1 | 1 | 0 | 0 | 1 |
| 1 | 1 | 0 | 0 | 0 |
| 0 | 0 | 0 | 0 | 0 |
| 0 | 0 | 0 | 0 | 1 |
| 0 | 0 | 0 | 0 | 1 |
| 1 | 2 | 1 | 1 | 1 |
| 1 | 1 | 0 | 0 | 0 |
| 1 | 1 | 0 | 0 | 1 |
| 1 | 2 | 1 | 0 | 0 |
| 1 | 1 | 0 | 0 | 0 |
| 0 | 0 | 0 | 0 | 1 |
| 1 | 1 | 0 | 0 | 1 |
| 0 | 0 | 0 | 0 | 0 |
| 1 | 1 | 0 | 0 | 0 |
| 0 | 0 | 0 | 0 | 0 |
| 0 | 0 | 0 | 0 | 0 |
| 1 | 1 | 0 | 0 | 0 |
| 1 | 2 | 1 | 0 | 1 |
| 0 | 0 | 0 | 0 | 1 |
| 1 | 2 | 1 | 0 | 0 |
| 0 | 0 | 0 | 0 | 0 |
| 0 | 0 | 0 | 0 | 0 |
| 1 | 1 | 0 | 0 | 0 |
| 1 | 2 | 1 | 0 | 0 |
| 0 | 0 | 0 | 0 | 0 |
| 0 | 0 | 0 | 0 | 1 |
| 1 | 2 | 1 | 1 | 1 |
| 1 | 1 | 0 | 0 | 0 |
| 1 | 1 | 0 | 0 | 0 |
| 0 | 0 | 0 | 0 | 1 |
| 1 | 1 | 0 | 0 | 0 |
| 1 | 2 | 1 | 0 | 1 |
| 0 | 0 | 0 | 0 | 0 |
| 1 | 1 | 0 | 0 | 0 |

|   |   |   |   |   |
|---|---|---|---|---|
| 1 | 2 | 1 | 0 | 0 |
| 1 | 1 | 0 | 0 | 0 |
| 1 | 1 | 0 | 0 | 0 |
| 1 | 2 | 1 | 0 | 0 |
| 1 | 2 | 1 | 0 | 0 |
| 0 | 0 | 0 | 0 | 0 |
| 1 | 1 | 0 | 0 | 0 |
| 1 | 1 | 0 | 0 | 0 |
| 1 | 1 | 0 | 0 | 1 |
| 0 | 0 | 0 | 0 | 0 |
| 1 | 1 | 0 | 0 | 0 |
| 1 | 2 | 1 | 0 | 0 |
| 1 | 2 | 0 | 1 | 1 |
| 1 | 2 | 0 | 1 | 1 |
| 0 | 0 | 0 | 0 | 0 |
| 0 | 0 | 0 | 0 | 0 |
| 1 | 1 | 0 | 0 | 0 |
| 0 | 0 | 0 | 0 | 0 |
| 1 | 2 | 1 | 0 | 0 |
| 0 | 0 | 0 | 0 | 1 |
| 0 | 0 | 0 | 0 | 1 |
| 0 | 0 | 0 | 0 | 1 |
| 0 | 0 | 0 | 0 | 1 |
| 1 | 1 | 0 | 0 | 1 |
| 1 | 1 | 0 | 0 | 0 |
| 0 | 0 | 0 | 0 | 0 |
| 0 | 0 | 0 | 0 | 0 |
| 1 | 1 | 0 | 0 | 0 |

| border or high triglyd | border or highLDL | border or low HDL | border or high non-HDL chol | obesity 2 | nutrition 2 |
|------------------------|-------------------|-------------------|-----------------------------|-----------|-------------|
| 0                      |                   | 0                 | 1                           | 0         | 0           |
| 1                      |                   | 0                 | 0                           | 1         | 0           |
| 0                      |                   | 0                 | 1                           | 0         | 0           |
| 0                      |                   | 1                 | 0                           | 1         | 0           |
| 1                      |                   | 0                 | 0                           | 1         | 0           |
| 0                      |                   | 0                 | 1                           | 0         | 0           |
| 1                      |                   | 0                 | 1                           | 0         | 0           |
| 1                      |                   | 0                 | 1                           | 0         | 0           |
| 0                      |                   | 1                 | 1                           | 1         | 0           |
| 1                      |                   | 0                 | 0                           | 0         | 0           |
| 1                      |                   | 1                 | 1                           | 1         | 0           |
| 0                      |                   | 0                 | 1                           | 0         | 0           |
| 0                      |                   | 0                 | 0                           | 0         | 0           |
| 1                      |                   | 0                 | 1                           | 1         | 0           |
| 1                      |                   | 0                 | 1                           | 0         | 0           |
| 0                      |                   | 1                 | 0                           | 1         | 0           |
| 0                      |                   | 1                 | 1                           | 1         | 0           |
| 1                      |                   | 1                 | 0                           | 1         | 0           |
| 0                      |                   | 0                 | 1                           | 0         | 0           |
| 1                      |                   | 0                 | 1                           | 0         | 0           |
| 1                      |                   | 0                 | 1                           | 0         | 0           |
| 0                      |                   | 1                 | 0                           | 1         | 0           |
| 1                      |                   | 1                 | 1                           | 1         | 0           |
| 0                      |                   | 0                 | 0                           | 0         | 0           |
| 0                      |                   | 0                 | 1                           | 0         | 1           |
| 1                      |                   | 0                 | 1                           | 0         | 0           |
| 1                      |                   | 0                 | 1                           | 0         | 0           |
| 1                      |                   | 0                 | 1                           | 0         | 0           |
| 1                      |                   | 0                 | 1                           | 0         | 0           |
| 1                      |                   | 0                 | 0                           | 1         | 0           |
| 1                      |                   | 1                 | 1                           | 1         | 0           |
| 0                      |                   | 0                 | 1                           | 0         | 1           |
| 1                      |                   | 0                 | 1                           | 0         | 0           |
| 1                      |                   | 0                 | 1                           | 0         | 0           |
| 1                      |                   | 1                 | 1                           | 1         | 0           |
| 0                      |                   | 1                 | 1                           | 1         | 0           |
| 1                      |                   | 1                 | 1                           | 1         | 0           |
| 1                      |                   | 0                 | 1                           | 0         | 0           |
| 1                      |                   | 0                 | 1                           | 0         | 0           |
| 1                      |                   | 0                 | 1                           | 0         | 0           |
| 1                      |                   | 0                 | 1                           | 0         | 0           |
| 1                      |                   | 1                 | 1                           | 1         | 0           |
| 0                      |                   | 0                 | 0                           | 0         | 0           |

|   |   |   |   |   |   |
|---|---|---|---|---|---|
| 0 | 1 | 1 | 1 | 0 | 0 |
| 0 | 0 | 1 | 0 | 0 | 1 |
| 0 | 0 | 1 | 1 | 0 | 0 |
| 1 | 0 | 1 | 1 | 0 | 0 |
| 0 | 1 | 0 | 1 | 1 | 0 |
| 1 | 0 | 1 | 0 | 0 | 1 |
| 0 | 0 | 1 | 1 | 0 | 0 |
| 1 | 1 | 1 | 1 | 1 | 0 |
| 1 | 1 | 1 | 1 | 0 | 0 |
| 1 | 1 | 0 | 0 | 1 | 0 |
| 1 | 1 | 0 | 1 | 1 | 0 |
| 0 | 1 | 1 | 1 | 1 | 0 |
| 0 | 1 | 1 | 1 | 1 | 0 |
| 0 | 1 | 1 | 1 | 1 | 0 |
| 1 | 1 | 1 | 1 | 1 | 0 |
| 1 | 0 | 1 | 1 | 0 | 0 |
| 1 | 1 | 1 | 1 | 1 | 0 |
| 0 | 0 | 0 | 0 | 0 | 0 |
| 0 | 0 | 1 | 1 | 0 | 0 |
| 0 | 0 | 1 | 1 | 0 | 0 |
| 1 | 1 | 1 | 1 | 1 | 0 |
| 0 | 0 | 1 | 1 | 0 | 0 |
| 1 | 0 | 1 | 1 | 0 | 0 |
| 0 | 0 | 1 | 1 | 0 | 0 |
| 0 | 1 | 1 | 1 | 0 | 0 |
| 0 | 0 | 1 | 1 | 0 | 0 |
| 1 | 0 | 1 | 1 | 0 | 0 |
| 1 | 0 | 0 | 0 | 1 | 0 |
| 1 | 1 | 1 | 1 | 1 | 0 |
| 1 | 1 | 1 | 1 | 1 | 0 |
| 1 | 0 | 1 | 1 | 1 | 0 |
| 1 | 0 | 1 | 1 | 0 | 0 |
| 0 | 1 | 0 | 0 | 1 | 0 |
| 0 | 0 | 0 | 1 | 0 | 0 |
| 0 | 0 | 1 | 1 | 0 | 0 |
| 1 | 1 | 1 | 1 | 1 | 1 |
| 0 | 0 | 1 | 1 | 0 | 1 |
| 0 | 1 | 0 | 0 | 1 | 0 |
| 0 | 0 | 1 | 1 | 0 | 0 |
| 1 | 1 | 1 | 1 | 1 | 0 |
| 1 | 0 | 1 | 1 | 0 | 0 |
| 0 | 1 | 0 | 0 | 1 | 0 |
| 1 | 0 | 0 | 0 | 0 | 0 |
| 1 | 0 | 1 | 1 | 0 | 0 |



|   |   |   |   |   |   |
|---|---|---|---|---|---|
| 1 | 0 | 1 | 0 | 0 | 1 |
| 0 | 1 | 1 | 1 | 0 | 0 |
| 1 | 1 | 1 | 1 | 0 | 0 |
| 0 | 0 | 0 | 0 | 0 | 0 |
| 1 | 1 | 1 | 1 | 0 | 1 |
| 1 | 1 | 1 | 1 | 1 | 2 |
| 0 | 0 | 1 | 0 | 0 | 0 |
| 0 | 1 | 0 | 1 | 1 | 0 |
| 1 | 0 | 1 | 0 | 0 | 0 |
| 1 | 0 | 0 | 1 | 0 | 0 |
| 1 | 0 | 1 | 1 | 0 | 0 |
| 0 | 1 | 1 | 1 | 0 | 0 |
| 0 | 0 | 0 | 0 | 1 | 2 |
| 1 | 1 | 1 | 1 | 0 | 1 |
| 0 | 1 | 1 | 1 | 0 | 0 |
| 0 | 0 | 0 | 0 | 0 | 0 |
| 1 | 0 | 1 | 1 | 0 | 0 |
| 0 | 1 | 0 | 0 | 1 | 1 |
| 1 | 0 | 0 | 0 | 0 | 0 |
| 1 | 0 | 1 | 1 | 0 | 0 |
| 1 | 1 | 1 | 1 | 1 | 2 |
| 1 | 0 | 1 | 1 | 0 | 0 |
| 0 | 0 | 0 | 0 | 1 | 2 |
| 1 | 1 | 1 | 1 | 0 | 0 |
| 1 | 1 | 1 | 1 | 0 | 0 |
| 0 | 0 | 1 | 1 | 0 | 0 |
| 0 | 1 | 1 | 1 | 0 | 0 |
| 0 | 0 | 1 | 1 | 0 | 0 |
| 1 | 0 | 1 | 1 | 0 | 0 |
| 1 | 1 | 1 | 1 | 0 | 0 |
| 0 | 0 | 1 | 1 | 0 | 0 |
| 0 | 0 | 0 | 0 | 0 | 0 |
| 0 | 0 | 1 | 1 | 0 | 0 |
| 1 | 1 | 0 | 1 | 0 | 1 |
| 0 | 0 | 0 | 0 | 0 | 0 |
| 1 | 0 | 1 | 0 | 0 | 0 |
| 1 | 0 | 0 | 0 | 0 | 0 |
| 0 | 0 | 0 | 0 | 0 | 0 |
| 1 | 1 | 1 | 1 | 0 | 0 |
| 0 | 0 | 1 | 1 | 0 | 1 |
| 1 | 0 | 1 | 1 | 0 | 0 |
| 0 | 1 | 0 | 0 | 1 | 0 |
| 1 | 0 | 1 | 0 | 0 | 0 |

|   |   |   |   |   |   |
|---|---|---|---|---|---|
| 1 | 1 | 0 | 1 | 0 | 0 |
| 1 | 0 | 1 | 1 | 0 | 0 |
| 1 | 0 | 0 | 1 | 0 | 0 |
| 0 | 1 | 0 | 1 | 0 | 0 |
| 0 | 0 | 1 | 0 | 0 | 0 |
| 0 | 0 | 0 | 0 | 0 | 0 |
| 0 | 0 | 1 | 0 | 1 | 2 |
| 1 | 1 | 1 | 1 | 0 | 0 |
| 1 | 0 | 1 | 1 | 0 | 0 |
| 1 | 1 | 0 | 1 | 0 | 0 |
| 0 | 0 | 0 | 0 | 0 | 0 |
| 1 | 0 | 0 | 0 | 0 | 0 |
| 1 | 0 | 1 | 1 | 0 | 1 |
| 0 | 1 | 1 | 0 | 0 | 0 |
| 0 | 0 | 1 | 0 | 0 | 0 |
| 0 | 0 | 1 | 0 | 0 | 0 |
| 1 | 1 | 1 | 1 | 0 | 0 |
| 0 | 0 | 1 | 0 | 0 | 0 |
| 1 | 0 | 1 | 0 | 0 | 0 |
| 0 | 0 | 1 | 0 | 0 | 0 |
| 0 | 1 | 1 | 0 | 0 | 0 |
| 1 | 0 | 1 | 0 | 0 | 0 |
| 0 | 0 | 0 | 1 | 0 | 0 |
| 0 | 0 | 1 | 0 | 0 | 0 |
| 0 | 0 | 0 | 1 | 0 | 0 |
| 1 | 1 | 0 | 0 | 1 | 2 |
| 0 | 1 | 0 | 1 | 0 | 0 |
| 0 | 0 | 1 | 0 | 0 | 0 |
| 1 | 0 | 0 | 1 | 0 | 0 |
| 1 | 0 | 1 | 0 | 0 | 0 |
| 1 | 1 | 1 | 1 | 0 | 0 |
| 0 | 0 | 1 | 0 | 0 | 0 |
| 0 | 0 | 0 | 0 | 0 | 0 |
| 1 | 0 | 0 | 0 | 0 | 0 |
| 0 | 0 | 0 | 0 | 0 | 0 |
| 1 | 0 | 1 | 1 | 0 | 0 |
| 1 | 0 | 1 | 1 | 0 | 0 |
| 1 | 0 | 0 | 0 | 1 | 0 |
| 1 | 0 | 1 | 1 | 0 | 0 |
| 0 | 1 | 0 | 0 | 0 | 0 |
| 1 | 1 | 0 | 0 | 1 | 0 |
| 0 | 0 | 1 | 0 | 0 | 0 |

|   |   |   |   |   |   |
|---|---|---|---|---|---|
| 0 | 0 | 0 | 1 | 0 | 0 |
| 0 | 0 | 0 | 0 | 0 | 0 |
| 0 | 0 | 0 | 0 | 0 | 0 |
| 0 | 0 | 1 | 0 | 0 | 1 |
| 0 | 0 | 0 | 0 | 0 | 0 |
| 1 | 0 | 0 | 1 | 0 | 1 |
| 1 | 0 | 0 | 0 | 0 | 1 |
| 0 | 0 | 0 | 0 | 0 | 0 |
| 0 | 0 | 1 | 0 | 0 | 0 |
| 0 | 1 | 0 | 1 | 0 | 1 |
| 0 | 0 | 0 | 0 | 0 | 0 |
| 0 | 0 | 1 | 1 | 0 | 0 |
| 1 | 0 | 1 | 0 | 0 | 0 |
| 0 | 0 | 0 | 0 | 0 | 0 |
| 0 | 0 | 1 | 0 | 0 | 0 |
| 0 | 0 | 0 | 0 | 0 | 0 |
| 0 | 0 | 1 | 0 | 0 | 0 |
| 0 | 0 | 0 | 0 | 0 | 0 |
| 0 | 1 | 0 | 1 | 0 | 0 |
| 0 | 1 | 1 | 1 | 0 | 0 |
| 1 | 0 | 1 | 0 | 0 | 0 |
| 0 | 1 | 1 | 1 | 1 | 2 |
| 0 | 0 | 0 | 0 | 0 | 0 |
| 0 | 0 | 0 | 0 | 0 | 0 |
| 1 | 0 | 0 | 0 | 0 | 0 |
| 0 | 0 | 0 | 0 | 0 | 0 |
| 1 | 0 | 0 | 0 | 0 | 0 |
| 1 | 0 | 0 | 0 | 0 | 1 |
| 0 | 0 | 0 | 0 | 0 | 0 |
| 0 | 0 | 0 | 0 | 0 | 1 |
| 1 | 0 | 0 | 0 | 0 | 0 |
| 1 | 0 | 1 | 1 | 0 | 0 |
| 1 | 1 | 0 | 0 | 0 | 0 |
| 1 | 1 | 1 | 0 | 0 | 0 |
| 1 | 1 | 1 | 1 | 0 | 0 |
| 0 | 0 | 1 | 1 | 0 | 0 |
| 1 | 0 | 1 | 0 | 0 | 0 |
| 1 | 1 | 1 | 1 | 0 | 0 |
| 0 | 0 | 0 | 1 | 0 | 0 |
| 1 | 0 | 1 | 0 | 0 | 0 |
| 1 | 1 | 1 | 1 | 0 | 1 |
| 0 | 0 | 0 | 0 | 0 | 0 |
| 1 | 1 | 0 | 1 | 0 | 0 |
| 1 | 0 | 0 | 0 | 0 | 0 |
| 0 | 0 | 1 | 0 | 0 | 0 |

|   |   |   |   |   |   |
|---|---|---|---|---|---|
| 0 | 1 | 1 | 1 | 0 | 0 |
| 0 | 0 | 1 | 0 | 0 | 0 |
| 1 | 0 | 1 | 0 | 0 | 0 |
| 1 | 0 | 1 | 0 | 0 | 0 |
| 1 | 1 | 1 | 1 | 0 | 0 |
| 1 | 0 | 1 | 1 | 0 | 0 |
| 1 | 1 | 1 | 1 | 0 | 0 |
| 1 | 0 | 0 | 0 | 0 | 0 |
| 1 | 0 | 1 | 1 | 0 | 0 |
| 1 | 0 | 1 | 1 | 0 | 0 |
| 1 | 1 | 1 | 1 | 0 | 0 |
| 1 | 0 | 0 | 0 | 1 | 0 |
| 0 | 0 | 0 | 0 | 0 | 0 |
| 1 | 1 | 0 | 0 | 1 | 0 |
| 0 | 0 | 0 | 0 | 0 | 0 |
| 0 | 0 | 1 | 0 | 0 | 0 |
| 1 | 0 | 1 | 1 | 0 | 0 |
| 1 | 0 | 1 | 1 | 0 | 0 |
| 1 | 0 | 1 | 1 | 0 | 0 |
| 1 | 1 | 1 | 1 | 0 | 0 |
| 0 | 0 | 0 | 0 | 0 | 0 |
| 0 | 0 | 0 | 0 | 0 | 0 |
| 1 | 0 | 0 | 0 | 0 | 0 |
| 1 | 0 | 1 | 0 | 0 | 0 |
| 0 | 0 | 1 | 0 | 0 | 0 |
| 0 | 0 | 0 | 1 | 0 | 0 |
| 1 | 1 | 1 | 1 | 0 | 1 |
| 0 | 0 | 1 | 1 | 1 | 2 |
| 1 | 0 | 1 | 0 | 0 | 0 |
| 1 | 0 | 1 | 0 | 0 | 0 |
| 0 | 0 | 1 | 0 | 0 | 0 |
| 0 | 0 | 1 | 0 | 0 | 0 |
| 0 | 0 | 1 | 0 | 0 | 0 |
| 0 | 0 | 1 | 0 | 0 | 0 |
| 1 | 0 | 1 | 0 | 0 | 0 |
| 1 | 0 | 1 | 0 | 0 | 0 |
| 1 | 0 | 1 | 1 | 0 | 0 |
| 0 | 0 | 1 | 0 | 0 | 0 |
| 0 | 0 | 0 | 0 | 0 | 0 |
| 1 | 0 | 1 | 0 | 0 | 0 |
| 1 | 0 | 1 | 0 | 0 | 0 |

|   |   |   |   |   |   |
|---|---|---|---|---|---|
| 1 | 0 | 0 | 0 | 1 | 2 |
| 1 | 0 | 0 | 0 | 0 | 0 |
| 1 | 0 | 0 | 0 | 0 | 0 |
| 1 | 1 | 1 | 1 | 0 | 0 |
| 1 | 0 | 1 | 0 | 0 | 1 |
| 0 | 0 | 1 | 1 | 0 | 0 |
| 0 | 0 | 1 | 1 | 0 | 0 |
| 1 | 1 | 1 | 1 | 1 | 2 |
| 1 | 0 | 1 | 1 | 0 | 1 |
| 1 | 0 | 1 | 1 | 0 | 0 |
| 0 | 1 | 1 | 1 | 1 | 0 |
| 0 | 0 | 0 | 0 | 0 | 0 |
| 1 | 0 | 1 | 1 | 0 | 0 |
| 1 | 1 | 0 | 0 | 1 | 1 |
| 1 | 0 | 1 | 1 | 0 | 0 |
| 0 | 1 | 1 | 1 | 1 | 2 |
| 1 | 1 | 1 | 1 | 0 | 1 |
| 0 | 0 | 1 | 1 | 0 | 0 |
| 1 | 0 | 1 | 1 | 0 | 0 |
| 0 | 1 | 0 | 0 | 1 | 0 |
| 0 | 0 | 1 | 0 | 0 | 0 |
| 1 | 1 | 0 | 1 | 0 | 0 |
| 0 | 0 | 1 | 0 | 0 | 0 |
| 0 | 0 | 0 | 0 | 0 | 0 |
| 0 | 0 | 1 | 1 | 0 | 0 |
| 0 | 0 | 1 | 1 | 0 | 0 |
| 0 | 0 | 1 | 1 | 0 | 0 |
| 0 | 0 | 1 | 1 | 0 | 0 |
| 1 | 0 | 1 | 1 | 0 | 0 |
| 1 | 0 | 0 | 0 | 0 | 0 |
| 1 | 0 | 1 | 1 | 0 | 0 |
| 0 | 1 | 0 | 0 | 1 | 0 |
| 1 | 0 | 1 | 1 | 0 | 1 |
| 1 | 1 | 1 | 1 | 0 | 0 |
| 0 | 0 | 1 | 1 | 0 | 0 |
| 1 | 0 | 1 | 1 | 0 | 0 |
| 1 | 1 | 1 | 1 | 0 | 0 |
| 0 | 0 | 0 | 0 | 0 | 0 |
| 0 | 0 | 1 | 1 | 0 | 0 |
| 1 | 0 | 1 | 1 | 0 | 0 |
| 1 | 0 | 1 | 1 | 0 | 0 |

|   |   |   |   |   |   |
|---|---|---|---|---|---|
| 1 | 1 | 1 | 1 | 0 | 0 |
| 1 | 0 | 1 | 0 | 0 | 1 |
| 0 | 0 | 1 | 0 | 0 | 0 |
| 1 | 0 | 1 | 0 | 0 | 0 |
| 0 | 0 | 1 | 0 | 0 | 0 |
| 0 | 0 | 0 | 0 | 0 | 0 |
| 1 | 0 | 1 | 0 | 0 | 0 |
| 0 | 0 | 0 | 0 | 0 | 0 |
| 1 | 0 | 1 | 0 | 0 | 0 |
| 1 | 0 | 1 | 1 | 0 | 0 |
| 1 | 0 | 1 | 1 | 0 | 0 |
| 1 | 0 | 1 | 1 | 0 | 0 |
| 1 | 0 | 1 | 1 | 0 | 0 |
| 1 | 0 | 1 | 1 | 0 | 0 |
| 1 | 0 | 1 | 1 | 0 | 0 |
| 1 | 1 | 1 | 1 | 0 | 0 |
| 0 | 0 | 1 | 1 | 0 | 0 |
| 1 | 1 | 1 | 1 | 0 | 0 |
| 1 | 0 | 1 | 1 | 1 | 2 |
| 0 | 0 | 1 | 0 | 0 | 1 |
| 0 | 1 | 0 | 1 | 0 | 0 |
| 1 | 1 | 1 | 1 | 0 | 0 |
| 0 | 0 | 0 | 0 | 0 | 1 |
| 1 | 0 | 1 | 0 | 0 | 0 |
| 0 | 0 | 1 | 0 | 0 | 0 |
| 1 | 0 | 1 | 0 | 0 | 0 |
| 1 | 0 | 1 | 0 | 0 | 0 |
| 1 | 0 | 1 | 0 | 0 | 0 |
| 1 | 0 | 1 | 0 | 0 | 0 |
| 1 | 0 | 0 | 0 | 0 | 0 |
| 1 | 0 | 1 | 0 | 0 | 1 |
| 1 | 0 | 1 | 0 | 0 | 0 |
| 0 | 0 | 1 | 0 | 0 | 0 |
| 1 | 0 | 1 | 0 | 0 | 0 |
| 1 | 0 | 0 | 0 | 0 | 0 |
| 1 | 1 | 1 | 1 | 0 | 0 |
| 1 | 1 | 1 | 1 | 0 | 0 |
| 0 | 0 | 1 | 1 | 0 | 1 |
| 1 | 0 | 1 | 0 | 0 | 0 |
| 1 | 1 | 0 | 1 | 0 | 0 |
| 1 | 0 | 1 | 1 | 0 | 0 |
| 1 | 1 | 1 | 1 | 0 | 1 |
| 1 | 0 | 0 | 0 | 0 | 0 |
| 1 | 0 | 1 | 1 | 0 | 0 |
| 1 | 0 | 1 | 1 | 1 | 2 |

|   |   |   |   |   |   |
|---|---|---|---|---|---|
| 1 | 0 | 1 | 1 | 0 | 0 |
| 1 | 0 | 1 | 0 | 0 | 1 |
| 1 | 0 | 1 | 0 | 0 | 0 |
| 1 | 0 | 1 | 1 | 0 | 0 |
| 1 | 0 | 1 | 0 | 0 | 0 |
| 0 | 0 | 0 | 0 | 0 | 0 |
| 1 | 0 | 1 | 0 | 0 | 0 |
| 1 | 0 | 1 | 1 | 0 | 0 |
| 1 | 1 | 1 | 1 | 0 | 0 |
| 1 | 0 | 0 | 0 | 0 | 0 |
| 1 | 0 | 1 | 0 | 0 | 0 |
| 1 | 0 | 1 | 0 | 0 | 0 |
| 1 | 1 | 0 | 1 | 0 | 0 |
| 1 | 1 | 0 | 0 | 1 | 0 |
| 0 | 0 | 1 | 0 | 0 | 0 |
| 0 | 0 | 0 | 0 | 0 | 0 |
| 0 | 1 | 1 | 1 | 0 | 0 |
| 0 | 0 | 0 | 0 | 0 | 0 |
| 1 | 0 | 1 | 0 | 0 | 0 |
| 0 | 0 | 1 | 0 | 0 | 1 |
| 0 | 1 | 1 | 1 | 0 | 0 |
| 0 | 1 | 0 | 1 | 0 | 0 |
| 1 | 1 | 0 | 1 | 1 | 2 |
| 0 | 0 | 1 | 0 | 0 | 0 |
| 0 | 0 | 1 | 1 | 0 | 0 |
| 1 | 0 | 1 | 1 | 0 | 0 |
| 1 | 0 | 1 | 0 | 0 | 1 |
